# Supplementary material for: Single-atom Fe–N4 site for the hydrogenation of nitrobenzene: theoretical and experimental studies
Source: Royal Society of Chemistry journal article supplement (doi:10.1039/d1dt01227d), 2021-01-01
Supplement: d1dt01227d1.pdf [file d1dt01227d1.pdf]

## Electronic Supplementary Information

### Single-atom Fe-N<sub>4</sub> site for hydrogenation of nitrobenzene : theoretical and experimental study

Yan Liu <sup>a</sup>, Wenzhuang Zhang <sup>a</sup>, Yamin Zheng <sup>a</sup>, Konglin Wu <sup>b</sup>, Panpan Dong <sup>a</sup>, Rong He <sup>c</sup>, Ning Lu <sup>a</sup> and Junjie Mao <sup>\*a</sup>

<sup>a</sup>Key Laboratory of Functional Molecular Solids, Ministry of Education, Anhui Province Key Laboratory of Optoelectric Materials Science and Technology and Anhui Laboratory of Molecule-Based Materials, Anhui Normal University, Wuhu, 241002, China

<sup>b</sup>School of Chemistry and Chemical Engineering, Anhui University of Technology, Maanshan 243002, China

<sup>c</sup>State Key Laboratory of Environment-friendly Energy Materials, Southwest University of Science and Technology, Mianyang, 621010, China

# 1. Experimental Section

**1.1 Chemicals.** All the chemicals were used without further purification. The iron nitrate nonahydrate ( $\text{Fe}(\text{NO}_3)_3 \cdot 9\text{H}_2\text{O}$ , >99%), sodium carbonate ( $\text{Na}_2\text{CO}_3$ , 99.0%), sodium hydroxide ( $\text{NaOH}$ , 99.0%), potassium persulfate ( $\text{K}_2\text{S}_2\text{O}_8$ ,  $\geq 99.5\%$ ), ethyl acetate ( $\text{C}_4\text{H}_8\text{O}_2$ ,  $\geq 99.5\%$ ), and ethanol ( $\text{C}_2\text{H}_6\text{O}$ , 99.0%) were purchased from Sinopharm Chemical Reagent Co. Ltd. (Shanghai, China). The styrene ( $\text{C}_8\text{H}_8$ , 99.0%), methacrylic acid ( $\text{C}_4\text{H}_6\text{O}_2$ , 98%), nitrobenzene ( $\text{C}_6\text{H}_5\text{NO}_2$ , 99%), and hydrazine hydrate ( $\text{N}_2\text{H}_4 \cdot \text{H}_2\text{O}$ , 80wt%) were all purchased from Aladdin Chemistry Co. Ltd. (Shanghai, China). The m-aminophenol ( $\text{C}_6\text{H}_7\text{NO}$ , 98%) and n-dodecane ( $\text{C}_{12}\text{H}_{26}$ , 99%) were provided from Alfa Aesar Chemical Co. Ltd. (China). The formaldehyde ( $\text{HCHO}$ , 37.0-40.0%) was purchased from Xilong Chemicals Co. Ltd. (China). Ultrapure Millipore water (18.2 M $\Omega$ ) was used in all experiments.

**1.2 Synthesis of polystyrene nanospheres (PS).** The synthetic procedure of the PS was adopted from the previous literature with slight modification. In a typical synthesis, 7.68 mL of styrene and 0.35 mL of methacrylic acid were dissolved in 80 mL of deionized water in sequence in a 200-mL three-necked flask, followed by drumming bubble of  $\text{N}_2$  for 15 min and keeping at 70 °C for 30 min under magnetic stirring. After that, 5 mL of aqueous solution containing 24 mg of  $\text{NaOH}$  and 24 mg  $\text{Na}_2\text{CO}_3$  was added into the solution. Then, 5 mL of aqueous solution containing 30 mg of  $\text{K}_2\text{S}_2\text{O}_8$  was quickly injected into the mixture to start the polymerization. The reaction was maintained at 70 °C for 24 h under magnetic stirring. After cooled down naturally, the latex was washed by ethanol and water for several times, and then freeze dried for further use.

**1.3 Synthesis of Fe SAs/NHCSs.** In a typical synthesis, 500 mg of PS was uniformly dissolved in 20 mL of deionized water in 50 mL round-bottom flask under vigorous stirring. The solution was then sonicated for 30 min to form a homogeneous solution. Then, 10.0 mL of aqueous solution containing 100 mg of m-aminophenol and 6 mg of  $\text{Fe}(\text{NO}_3)_3 \cdot 9\text{H}_2\text{O}$  was added into the round-bottom flask, followed by injecting 0.15 mL of  $\text{HCHO}$ . After that, the mixture was heated at 85 °C for 6 h. The PS@Fe(III)-APFR product was collected by centrifugation and washed by deionized water and ethanol for three times. The PS@Fe(III)-APFR was dried at 70 °C overnight and grinded into powder. In the pyrolysis step, the powder was heated at 600 °C with a

heating rate of 2 °C min<sup>-1</sup> and maintained at 600 °C for 2 h at Ar atmosphere, followed by raising the temperature to 800 °C with a heating rate of 5 °C min<sup>-1</sup> and calcined at 800 °C for 3 h.

**1.4 Synthesis of NHCSs.** The synthetic procedure of the NHCSs was similar with that of Fe SAs/NHCSs except for the addition of Fe(NO<sub>3</sub>)<sub>3</sub>·9H<sub>2</sub>O precursor.

**1.5 Synthesis of Fe nanoparticles (Fe NPs/NHCSs).** In a typical synthesis, 60 mg of Fe(NO<sub>3</sub>)<sub>3</sub>·9H<sub>2</sub>O and 200 mg of NHCSs were uniformly grinded. The mixture was then heated at 600 °C with a rate of 2 °C min<sup>-1</sup> and maintained at 600 °C for 2 h at Ar atmosphere, followed by raising the temperature to 800 °C with a heating rate of 5 °C min<sup>-1</sup> and calcined at 800 °C for 3 h.

**1.6 Characterization.** Powder X-ray diffraction patterns were measured with a Bruker D8 with Cu K $\alpha$  radiation ( $\lambda = 1.5406 \text{ \AA}$ ). Transmission electron microscopy and high-resolution Transmission electron microscopy images were recorded by a Hitachi H-800 operated at 100 kV and a JEOL-2100F operated at 200 kV, respectively. The aberration-corrected HAADF-STEM images were performed using a Titan 80-300 scanning/transmission electron microscope operated at 300 kV, equipped with a probe spherical aberration corrector. The in-situ environmental microscopic study was carried out on a Titan ETEM microscope (FEI) operated at 300 kV equipped with an image Cs-corrector. Inductively coupled plasma optical emission spectroscopy (ICP-OES) was measured by Thermo Fisher IRIS Intrepid II. The X-ray photoelectron spectroscopy (XPS) was measured by a PHI Quantera SXM system under  $3.1 \times 10^{-8}$  Pa using Al<sup>+</sup> radiation at room temperature.

**1.7 XAFS measurement and data analysis.** The X-ray absorption fine structure data (Co K-edge) were collected at 1W1B station in Beijing Synchrotron Radiation Facility (BSRF). The storage rings of BSRF were operated at 2.5 GeV with a maximum current of 250 mA. The data were collected at room temperature in transmission mode using N<sub>2</sub>-filled ionization chamber. All samples were pelletized as disks of 13 mm diameter using graphite powder as a binder. The acquired EXAFS data were processed according to the standard procedures using the ATHENA module implemented in the IFEFFIT software packages. The k<sup>3</sup>-weighted EXAFS spectra were obtained by subtracting the post-edge background from the overall absorption and then normalizing with respect to the edge-jump step. Subsequently, k<sup>3</sup>-weighted

$\chi(k)$  data of Co K-edge were Fourier transformed to real (R) space using a hanning windows ( $dk = 1.0 \text{ \AA}^{-1}$ ) to separate the EXAFS contributions from different coordination shells. To obtain the quantitative structural parameters around central atoms, least-squares curve parameter fitting was performed using the ARTEMIS module of IFEFFIT software packages. The following EXAFS equation was used:

$$\chi(k) = \sum_j \frac{N_j S_0^2 F_j(k)}{k R_j^2} \exp[-2k^2 \sigma_j^2] \exp\left[\frac{-2R_j}{\lambda(k)}\right] \sin[2k R_j + \phi_j(k)]$$

$S_0^2$  is the amplitude reduction factor,  $F_j(k)$  is the effective curved-wave backscattering amplitude,  $N_j$  is the number of neighbors in the  $j^{\text{th}}$  atomic shell,  $R_j$  is the distance between the X-ray absorbing central atom and the atoms in the  $j^{\text{th}}$  atomic shell (backscatterer),  $\lambda$  is the mean free path in  $\text{\AA}$ ,  $\phi_j(k)$  is the phase shift (including the phase shift for each shell and the total central atom phase shift),  $\sigma_j$  is the Debye-Waller parameter of the  $j^{\text{th}}$  atomic shell (variation of distances around the average  $R_j$ ). The functions  $F_j(k)$ ,  $\lambda$  and  $\phi_j(k)$  were calculated with the ab initio code FEFF8.2.

**1.8 Catalytic test.** In the catalytic hydrogenation of nitro-aromatic compounds, 1 mmol of nitro-aromatic, 2 mL of ethanol, and 10 mg of Fe SAs/NHCSs were added in a 15-mL glass vial under ultrasonic treatment. After the injection of 2 mL of  $\text{N}_2\text{H}_4 \cdot \text{H}_2\text{O}$ , the vial was sealed and maintained at 40 °C for 6 h under magnetic stirring. The product of the reaction was analyzed by gas chromatography-mass spectrometer (GC-MS) through using n-dodecane as internal standard. In the stability test, the Fe SAs/NHCSs was separated by centrifugation after each cycle. The collected catalyst was then washed by ethanol and water and dried for the next cycle.

**1.9 Computational Methods.** The Vienna ab initio simulation package (VASP)<sup>1</sup> code was utilized to implement spin-polarized density functional theory (DFT) calculations with the Perdew-Burke-Ernzerhof (PBE) functional of the generalized gradient approximation<sup>2</sup> and the projector augmented wave (PAW)<sup>3</sup> method. A plane-wave basis set with 400 eV cutoff was performed and a  $3 \times 3 \times 1$  K point mesh was employed for Brillouin zone integration<sup>4</sup>. The vacuum thickness was set to 15  $\text{\AA}$  to avoid adjacent interaction between layers. The  $6 \times 6$  graphene supercells was adopted in this works. All structures were optimized until the force and energy on each atom less than 0.02 eV/ $\text{\AA}$  and  $10^{-5}$  eV. The PBE+U approach<sup>5</sup> was carried out to correctly describe the strong Coulomb interactions of Fe d-orbitals with 4 eV U-correction.

Grimme's energy correction method (DFT-D2)<sup>6</sup> was employed to describe the long-range van der Waals interactions. The minimum energy paths were conducted using climbing nudged elastic band (CI-NEB)<sup>7</sup> method. All the transition states were further confirmed by frequency analysis.

## 2. Supplementary Figures

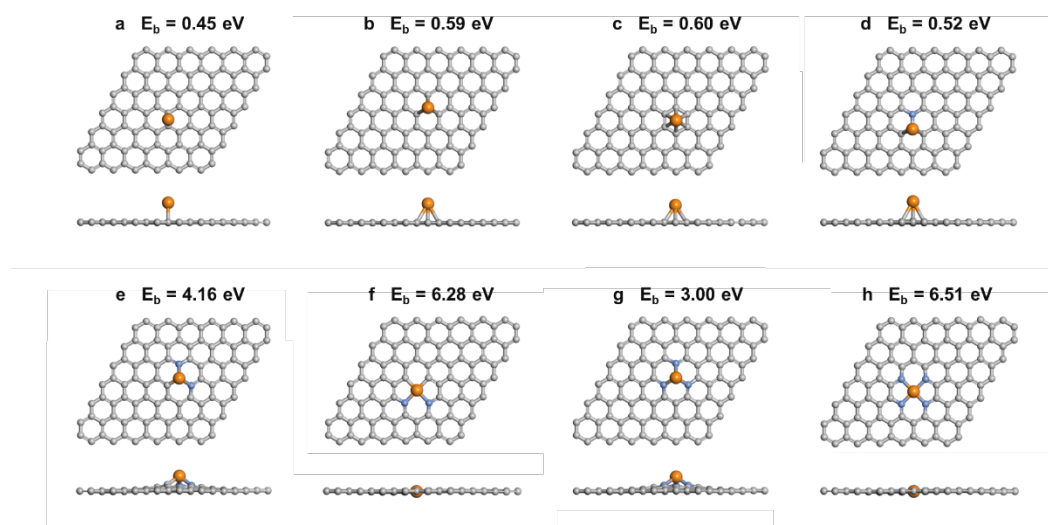

**Figure S1.** Optimized geometries and the binding energies of adsorbing Fe atom at the different sites of the graphene, (a) bridge site, (b) top site, (c) hole site, (d) N-doping graphene, (e) FeN<sub>2</sub>C<sub>1</sub> site, (f) FeN<sub>2</sub>C<sub>2</sub> site, (g) FeN<sub>3</sub> site, (h) FeN<sub>4</sub> site, C, N and Fe atoms are represented by grey, blue and orange balls, respectively.

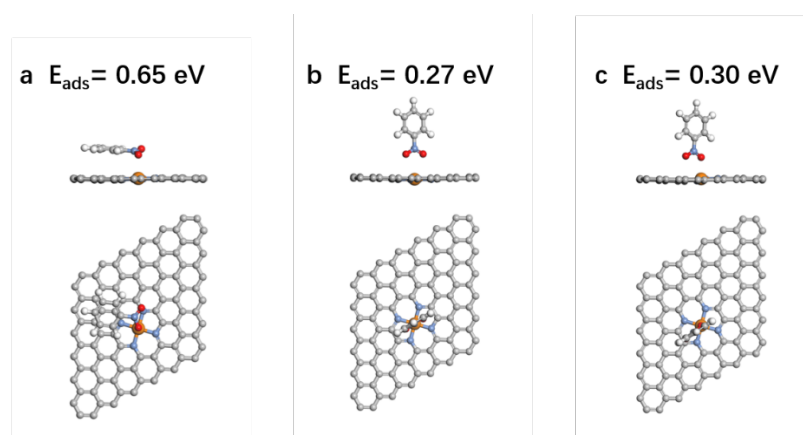

**Figure S2.** The optimized geometries and the adsorption energies of C<sub>6</sub>H<sub>5</sub>NO<sub>2</sub> on the Fe SAs surface. C, N, O, H and Fe atoms are represented by grey, blue, red, white, and orange balls, respectively.

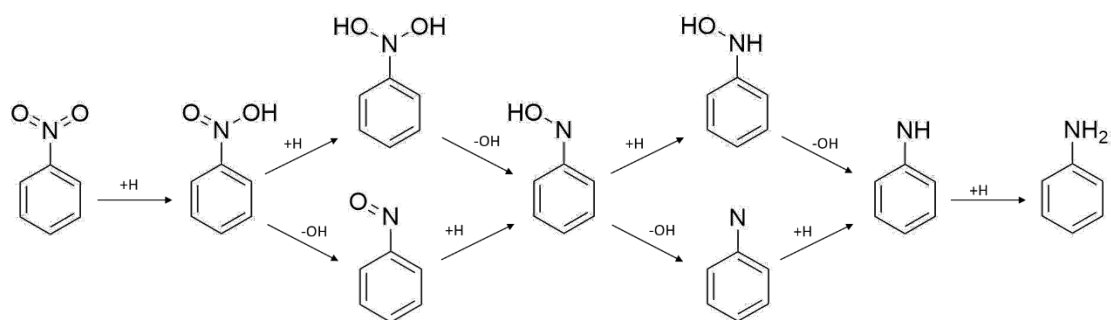

**Scheme S1.** The possible reaction pathways for the hydrogenation of nitrobenzene into aniline on the Fe SAs surface.

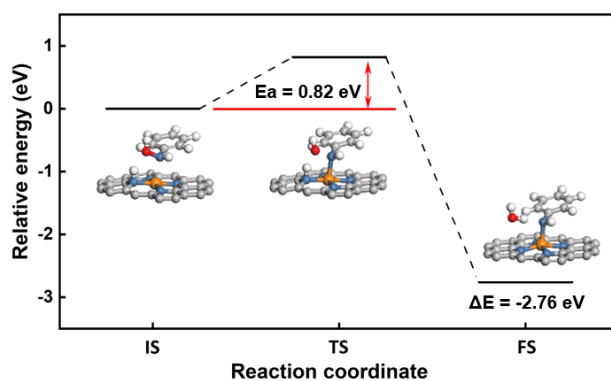

**Figure S3.** Energy profiles of possible pathway for the N-O bond cleavage of PhNHOH by forming a five-membered ring transition state.

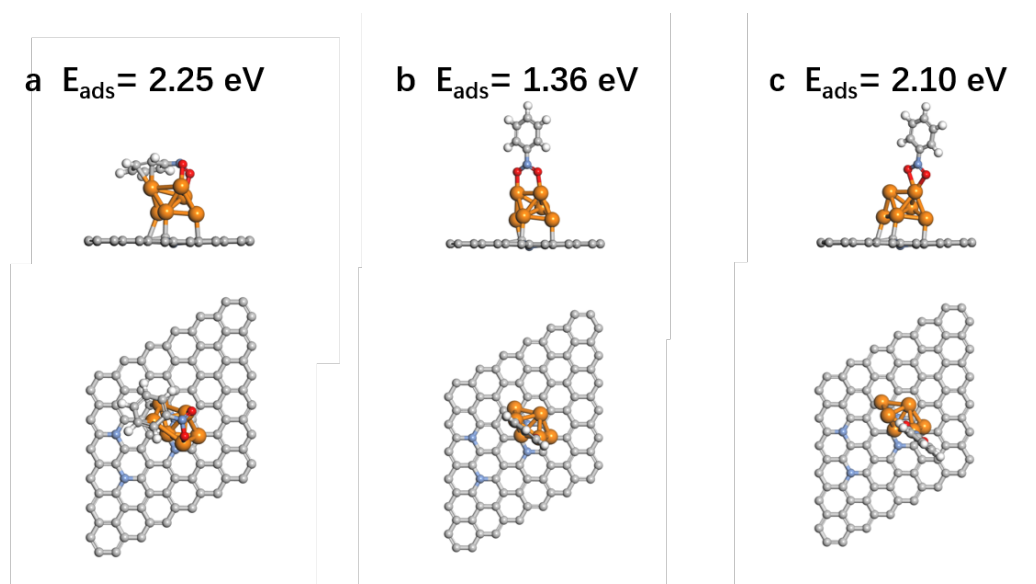

**Figure S4.** The optimized geometries and the adsorption energies of  $C_6H_5NO_2$  on the Fe NPs surface. C, N, O, H and Fe atoms are represented by grey, blue, red, white, and orange balls, respectively

**Table S1.** Calculated activation barriers (Ea, in eV) and reaction energies ( $\Delta E$ , in eV) of the elementary steps involved in nitrobenzene reduction to aniline on the Fe SAs.

| Reactions                                        | Ea   | $\Delta E$ |
|--------------------------------------------------|------|------------|
| $C_6H_5NO_2^* + H^* \rightarrow C_6H_5NOOH^*$    | 0.60 | -0.70      |
| $C_6H_5NOOH^* + H^* \rightarrow C_6H_5N(OH)_2^*$ | 0    | -1.61      |
| $C_6H_5NOOH^* \rightarrow C_6H_5NO^* + OH^*$     | 0.67 | -0.58      |
| $C_6H_5N(OH)_2^* \rightarrow C_6H_5NOH^* + OH^*$ | 0.89 | -0.23      |
| $C_6H_5NO^* + H^* \rightarrow C_6H_5NOH^*$       | 0.02 | -1.27      |
| $C_6H_5NOH^* + H^* \rightarrow C_6H_5NHOH^*$     | 0.02 | -2.21      |
| $C_6H_5NOH^* \rightarrow C_6H_5N^* + OH^*$       | 1.61 | 0.66       |
| $C_6H_5NHOH^* \rightarrow C_6H_5NH^* + OH^*$     | 0.87 | -0.15      |
| $C_6H_5N^* + H^* \rightarrow C_6H_5NH^*$         | 0.10 | -2.48      |
| $C_6H_5NH^* + H^* \rightarrow C_6H_5NH_2^*$      | 0    | -2.57      |

**Table S2.** Calculated activation barriers (Ea, in eV) and reaction energies ( $\Delta E$ , in eV) of the elementary steps involved in nitrobenzene reduction to aniline on Fe NPs.

| Reactions                                        | Ea   | $\Delta E$ |
|--------------------------------------------------|------|------------|
| $C_6H_5NO_2^* + H^* \rightarrow C_6H_5NOOH^*$    | 0.72 | 0.07       |
| $C_6H_5NOOH^* + H^* \rightarrow C_6H_5N(OH)_2^*$ | 2.99 | 1.18       |
| $C_6H_5NOOH^* \rightarrow C_6H_5NO^* + OH^*$     | 0    | -2.79      |
| $C_6H_5N(OH)_2^* \rightarrow C_6H_5NOH^* + OH^*$ | 0    | -3.53      |
| $C_6H_5NO^* + H^* \rightarrow C_6H_5NOH^*$       | 1.09 | 0.13       |
| $C_6H_5NOH^* + H^* \rightarrow C_6H_5NHOH^*$     | 1.77 | 0.66       |
| $C_6H_5NOH^* \rightarrow C_6H_5N^* + OH^*$       | 0    | -2.76      |
| $C_6H_5NHOH^* \rightarrow C_6H_5NH^* + OH^*$     | 0.16 | -3.93      |
| $C_6H_5N^* + H^* \rightarrow C_6H_5NH^*$         | 1.60 | -0.29      |
| $C_6H_5NH^* + H^* \rightarrow C_6H_5NH_2^*$      | 2.03 | 0.68       |



**Table S3.** Calculated the adsorption energies of the adsorbate involved in the hydrogenation of nitrobenzene into aniline on the Fe SAs and Fe NPs surface.

| Adsorbate                                   | $E_{\text{ads}}(\text{Fe SAs, eV})$ | $E_{\text{ads}}(\text{Fe NPs, eV})$ |
|---------------------------------------------|-------------------------------------|-------------------------------------|
| $\text{C}_6\text{H}_5\text{NO}_2$           | 0.65                                | 2.25                                |
| $\text{C}_6\text{H}_5\text{NOOH}$           | 0.64                                | 2.02                                |
| $\text{C}_6\text{H}_5\text{N}(\text{OH})_2$ | 0.77                                | 0.92                                |
| $\text{C}_6\text{H}_5\text{NO}$             | 0.68                                | 1.70                                |
| $\text{C}_6\text{H}_5\text{NOH}$            | 0.64                                | 2.29                                |
| $\text{C}_6\text{H}_5\text{NHOH}$           | 0.74                                | 0.88                                |
| $\text{C}_6\text{H}_5\text{N}$              | 1.24                                | 3.36                                |
| $\text{C}_6\text{H}_5\text{NH}$             | 1.10                                | 2.87                                |
| $\text{C}_6\text{H}_5\text{NH}_2$           | 0.79                                | 0.93                                |

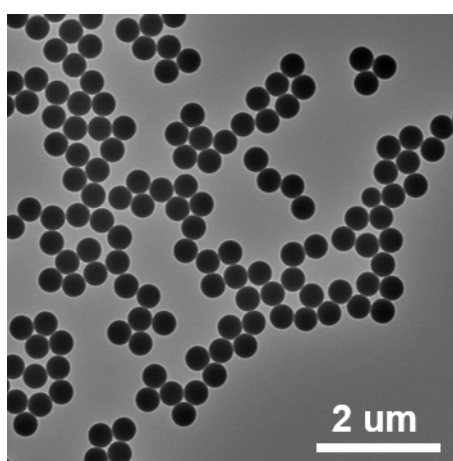

**Figure S5.** TEM image of the PS.

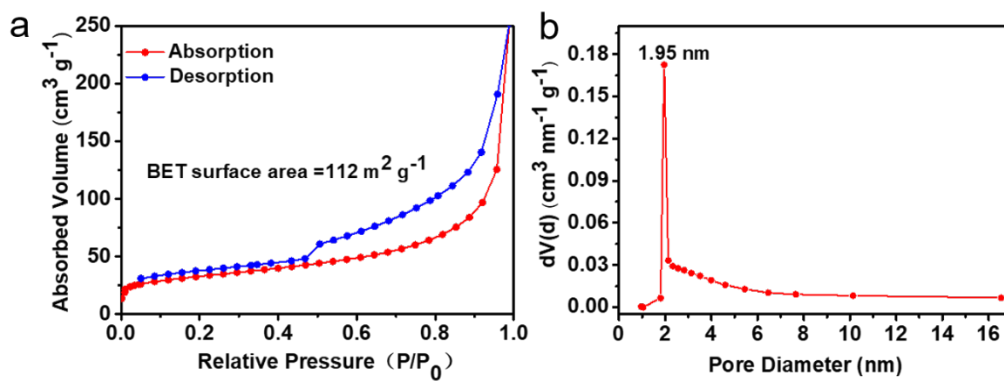

**Figure S6.** (a) Nitrogen isotherm adsorption/desorption of Fe SAs/NHCSs. (b) BJH pore size distribution of Fe SAs/NHCSs.

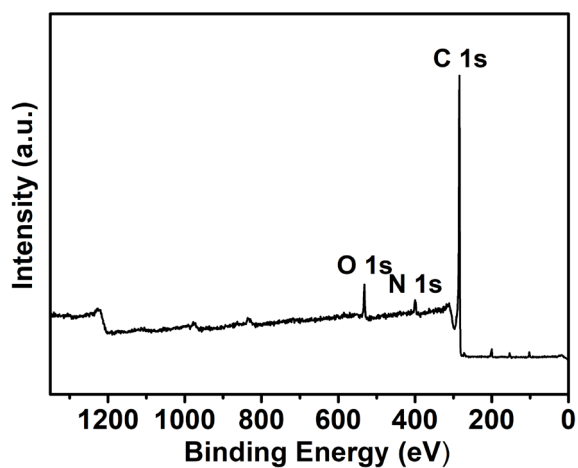

**Figure S7.** XPS spectra of Fe SAs/NHCSs.

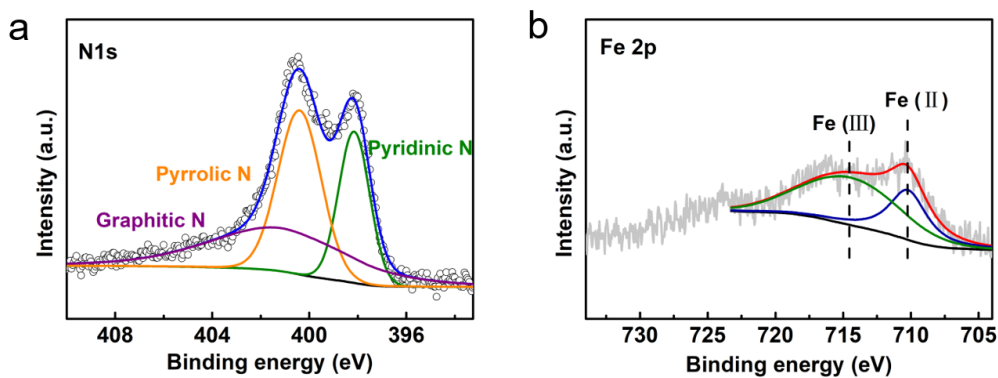

**Figure S8.** XPS survey spectra of Fe SAs/NHCSs. (a) N 1s spectra. (b) Fe 2p spectra.

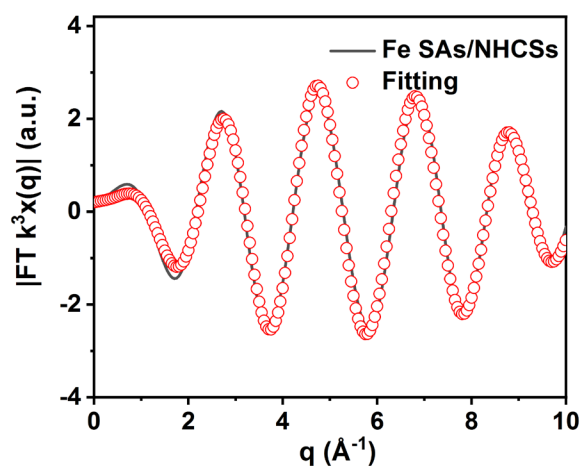

**Figure S9.** The EXAFS fitting curves of Fe SAs/NHCSs at q space.

**Table S4.** Structural parameters extracted from the Fe K-edge EXAFS fitting. ( $S_0^2=0.713$ )

| Sample       | Scattering pair | CN   | R(Å) | $\sigma^2(10^{-3}\text{Å}^2)$ | $\Delta E_0(\text{eV})$ | R factor |
|--------------|-----------------|------|------|-------------------------------|-------------------------|----------|
| Fe SAs/NHCSs | Fe-N            | 4.35 | 2.02 | 8.4                           | 3.6                     | 0.02     |
| Fe foil      | Fe-Fe1          | 8*   | 2.46 | 6.2                           | 4.4                     | 0.008    |
|              | Fe-Fe2          | 6*   | 2.84 | 7.8                           |                         |          |

$S_0^2$  is the amplitude reduction factor; CN is the coordination number; R is interatomic distance (the bond length between central atoms and surrounding coordination atoms);  $\sigma^2$  is Debye-Waller factor (a measure of thermal and static disorder in absorber-scatterer distances);  $\Delta E_0$  is edge-energy shift (the difference between the zero kinetic energy value of the sample and that of the theoretical model). R factor is used to value the goodness of the fitting.

\* This value was fixed during EXAFS fitting, based on the known structure.

Error bounds that characterize the structural parameters obtained by EXAFS spectroscopy were estimated as  $N \pm 20 \%$ ;  $R \pm 1 \%$ ;  $\sigma^2 \pm 25 \%$ ;  $\Delta E_0 \pm 10 \%$ .

Fe SAs/NHCSs (FT range:  $2.0\text{-}12.0 \text{ \AA}^{-1}$ ; fitting range:  $1.2\text{-}2.2 \text{ \AA}$ ).

Fe foil (FT range:  $2.0\text{-}12.0 \text{ \AA}^{-1}$ ; fitting range:  $1.4\text{-}3 \text{ \AA}$ ).

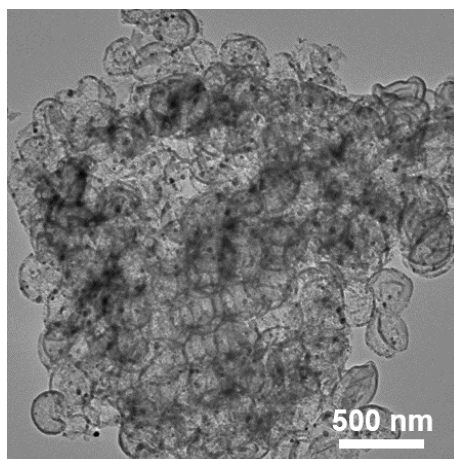

**Figure S10.** TEM image of Fe NPs/NHCSs.

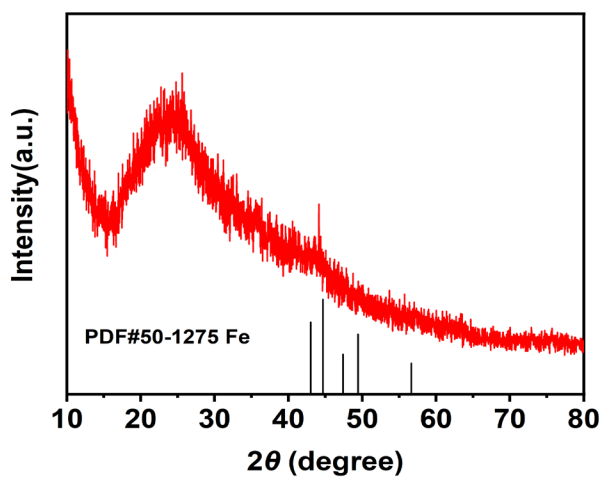

**Figure S11.** XRD pattern of Fe NPs/NHCSs.

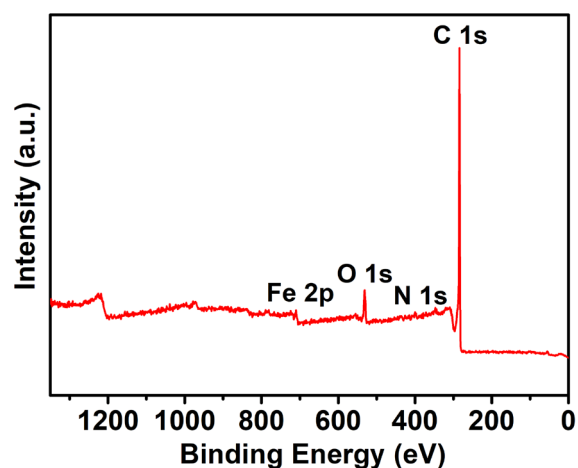

Figure S12. XPS spectra of Fe NPs/NHCSs.

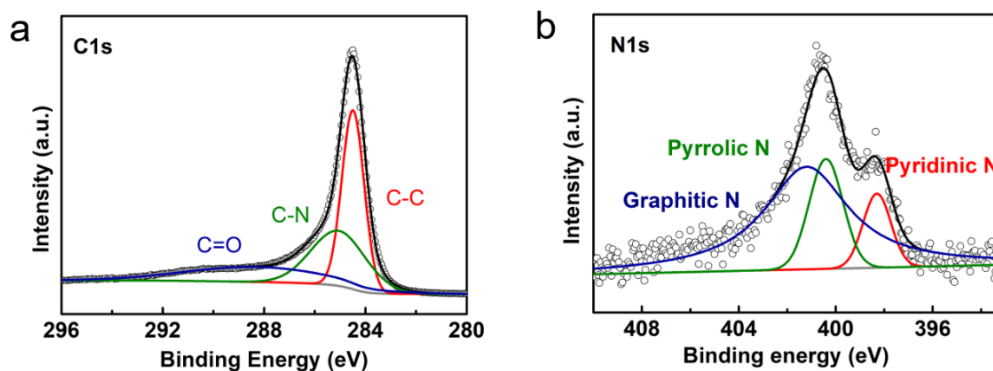

Figure S13. XPS survey spectra of Fe NPs/NHCSs. (a) C 1s spectra. (b) N 1s spectra.

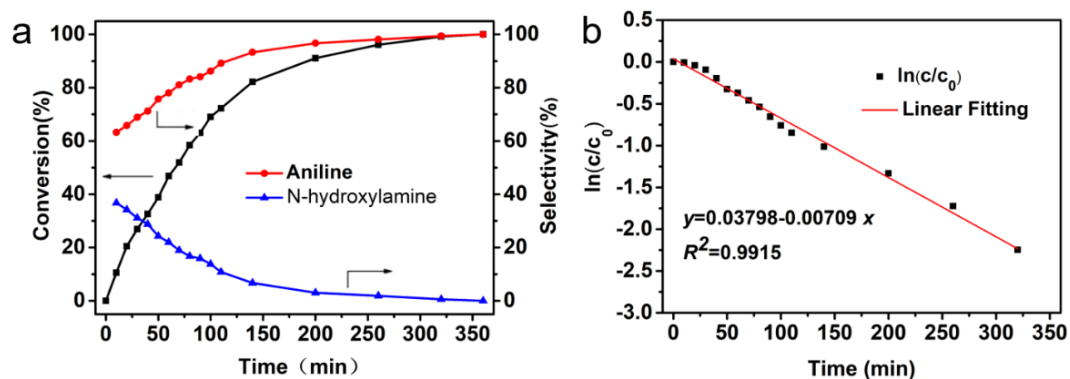

Figure S14. (a) Kinetic analysis and (b) linear fitting results hydrogenation of nitrobenzene.

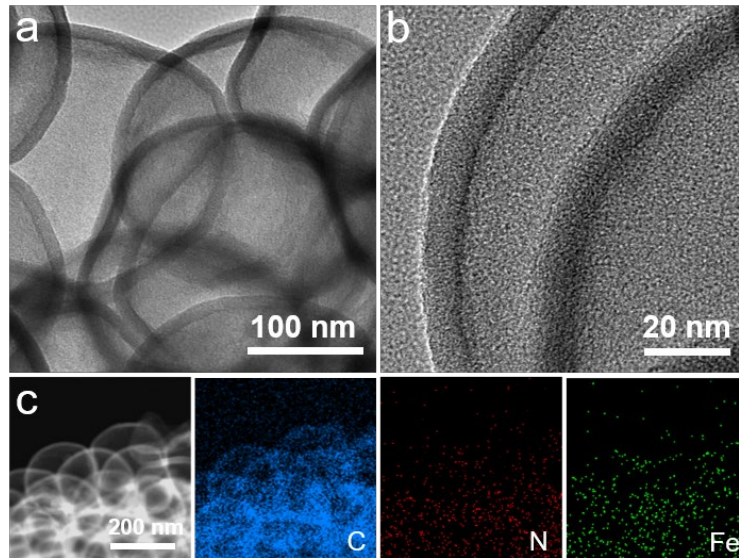

**Figure S15.** The characterization of Fe SAs/NHCSs after five reaction hydrogenation cycles for (a) TEM image. (b) HRTEM image. (c) EDX element mapping.

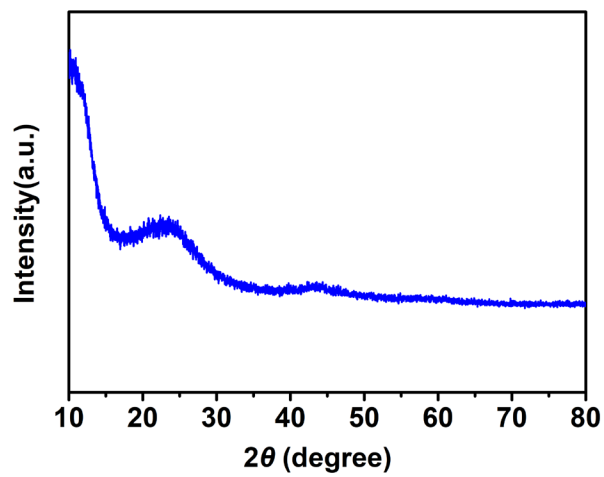

**Figure S16.** XRD pattern of Fe SAs/NHCSs after five reaction hydrogenation cycles.

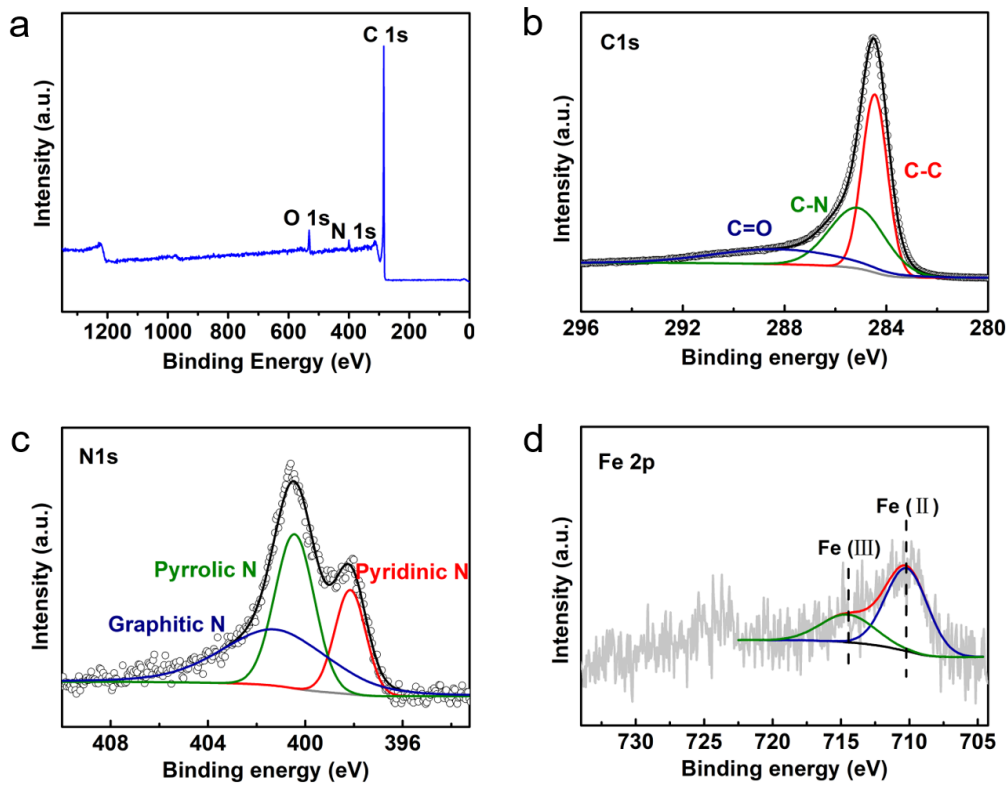

**Figure S17.** The XPS survey spectra of Fe SAs/NHCSs after stability test. (a) XPS spectra. (b) C 1s spectra. (c) N 1s spectra. (d) Fe 2p spectra.

**Table S5.** Control experiment of nitrobenzene hydrogenation<sup>a</sup>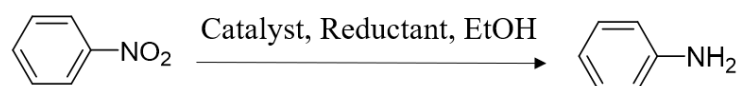

| Entry | Catalyst     | Reductant                                       | Temperature / °C | Time / h | Conversion <sup>b</sup> / % | Selectivity <sup>c</sup> / % |
|-------|--------------|-------------------------------------------------|------------------|----------|-----------------------------|------------------------------|
| 1     | Fe SAs/NHCSs | N <sub>2</sub> H <sub>4</sub> •H <sub>2</sub> O | 40               | 6        | 99                          | 99                           |
| 2     | None         | N <sub>2</sub> H <sub>4</sub> •H <sub>2</sub> O | 40               | 6        | 0.5                         | 99                           |
| 3     | NHCSs        | N <sub>2</sub> H <sub>4</sub> •H <sub>2</sub> O | 40               | 6        | 10                          | 99                           |
| 4     | Fe NPs/NHCSs | N <sub>2</sub> H <sub>4</sub> •H <sub>2</sub> O | 40               | 6        | 26                          | 80                           |

<sup>a</sup> Standard reaction condition: nitrobenzene (1 mmol), EtOH (2.0 mL) and reductant (2.0 mL, 80 wt%). Fe SAs/NHCSs (10 mg). Fe NPs/NHCSs (10 mg). NHCSs (10 mg).

<sup>b</sup> Conversion is determined by GC with n-dodecane as internal standard.

<sup>c</sup> Selectivity is determined by GC-MS.



**Table S6.** Comparison of the performance of nitrobenzene hydrogenation in literatures.

| Catalyst                                | Hydrogen source                                 | T/ °C | Time / h | Conv/% | Ref.                                                             |
|-----------------------------------------|-------------------------------------------------|-------|----------|--------|------------------------------------------------------------------|
| Fe SAs/NHCSs                            | N <sub>2</sub> H <sub>4</sub> •H <sub>2</sub> O | 40    | 6        | 99     | This work                                                        |
| Co-L <sub>1</sub> /C                    | H <sub>2</sub> (50 bar)                         | 110   | 4        | >99    | <i>Nat. Chem.</i> <b>2013</b> <sup>[S8]</sup>                    |
| Rh <sub>3</sub> Ni <sub>1</sub>         | H <sub>2</sub>                                  | R. T. | 5        | 99     | <i>ACS Catal.</i> <b>2013</b> <sup>[S9]</sup>                    |
| Fe NPs                                  | NaBH <sub>4</sub>                               | R. T. | 2-3      | 95     | <i>Chem. Commun.</i> <b>2012</b> <sup>[S10]</sup>                |
| Fe <sub>3</sub> O <sub>4</sub>          | N <sub>2</sub> H <sub>4</sub> •H <sub>2</sub> O | 80    | 1.5      | 99     | <i>Chem. Asian J.</i> <b>2011</b> <sup>[S11]</sup>               |
| PtNi <sub>3</sub>                       | H <sub>2</sub> (1 atm)                          | R. T. | 3        | 100    | <i>Angew. Chem. Int. Ed.</i> <b>2012</b> <sup>[S12]</sup>        |
| Pt-Ni nanodendrites                     | H <sub>2</sub> (1 atm)                          | R. T. | 1        | 100    | <i>Chem. Commun.</i> <b>2013</b> <sup>[S13]</sup>                |
| Pt <sub>1</sub> /α-MoC                  | H <sub>2</sub> (2 MPa)                          | 35    | 1.5      | 100    | <i>Nat. Nanotechnol.</i> <b>2019</b> <sup>[S14]</sup>            |
| Au/Sn-TiO <sub>2</sub> -123             | H <sub>2</sub> (1.3 MPa)                        | 100   | 1.5      | >99.5  | <i>Nat. Commun.</i> <b>2018</b> <sup>[S15]</sup>                 |
| Co SAs/NC                               | H <sub>2</sub> (3 MPa)                          | 110   | 4        | 99.7   | <i>ACS Appl. Mater. Interfaces.</i> <b>2020</b> <sup>[S16]</sup> |
| Co@mesoNC                               | H <sub>2</sub> (3 MPa)                          | 110   | 3        | 73     | <i>J. Catal.</i> <b>2018</b> <sup>[S17]</sup>                    |
| Pd@SiO <sub>2</sub>                     | H <sub>2</sub> (1 atm)                          | 45    | 1        | 83.3   | <i>J. Phys. Chem. C</i> <b>2013</b> <sup>[S18]</sup>             |
| Ru@C <sub>60</sub>                      | H <sub>2</sub> (30 bar)                         | 80    | 4        | 100    | <i>ACS Catal.</i> <b>2016</b> <sup>[S19]</sup>                   |
| Pt/CeO <sub>2</sub> -R-600              | H <sub>2</sub> (1 MPa)                          | R. T. | 2        | 100    | <i>ACS Catal.</i> <b>2020</b> <sup>[S20]</sup>                   |
| Fe <sub>3</sub> O <sub>4</sub> @CS_AgNi | NaBH <sub>4</sub>                               | R. T. | 1        | 77     | <i>ACS Omega</i> <b>2019</b> <sup>[S21]</sup>                    |
| Fe <sub>3</sub> O <sub>4</sub>          | N <sub>2</sub> H <sub>4</sub> •H <sub>2</sub> O | 90    | 3        | 99     | <i>Sci. Rep.</i> <b>2017</b> <sup>[S22]</sup>                    |

**R. T.:** room temperature. **L<sub>1</sub>:** 1,10-phenanthroline. **R:** rod.

### 3. References

- 1 G. Kresse and J. Furthmüller, *Comput. Mater. Sci.*, 1996, **6**, 15-50.
- 2 J. P. Perdew, K. Burke and M. Ernzerhof, *Phys. Rev. Lett.*, 1996, **77**, 3865-3868.
- 3 P. E. Blochl, *Phys. Rev. B*, 1994, **50**, 17953-17979.
- 4 H. J. Monkhorst and J. D. Pack, *Phys. Rev. B*, 1976, **13**, 5188-5192.
- 5 V. I. Anisimov, J. Zaanen and O. K. Andersen, *Phys. Rev. B*, 1991, **44**, 943-954.
- 6 S. Grimme, *J. Comput. Chem.*, 2006, **27**, 1787-1799.
- 7 G. Henkelman, B. P. Uberuaga and H. Jónsson, *J. Chem. Phys.*, 2000, **113**, 9901-9904.
- 8 F. A. Westerhaus, R. V. Jagadeesh, G. Wienhöfer, M. M. Pohl, J. Radnik, A. E. Surkus, J. Rabeah, K. Junge, H. Junge, M. Nielsen, A. Brückner and M. Beller, *Nat. Chem.*, 2013, **5**, 537-543.
- 9 S. F. Cai, H. H. Duan, H. P. Rong, D. S. Wang, L. S. Li, W. He and Y. D. Li, *ACS Catal.*, 2013, **3**, 608-612.
- 10 R. Dey, N. Mukherjee, S. Ahammed and B. C. Ranu, *Chem. Commun.*, 2012, **48**, 7982-7984.
- 11 S. Kim, E. Kim and B. M. Kim, *Chem. Asian J.*, 2011, **6**, 1921-1925.
- 12 Y. Wu, D. S. Wang, Z. Q. Niu, P. C. Chen, G. Zhou and Y. D. Li, *Angew. Chem. Int. Ed.*, 2012, **51**, 12524-12528.
- 13 W. Y. Wang, D. S. Wang, X. W. Liu, P. Qing and Y. D. Li, *Chem. Commun.*, 2013, **49**, 2903-2905.
- 14 L. L. Lin, S. Y. Yao, R. Gao, X. Liang, Q. L. Yu, Y. C. Deng, J. J. Liu, M. Peng, Z. Jiang, S. W. Li, Y. W. Li, X. D. Wen, W. Zhou and D. Ma, *Nat. Nanotechnol.*, 2019, **14**, 354-361.
- 15 L. Wang, E. J. Guan, J. Zhang, J. H. Yang, Y. H. Zhu, Y. Han, M. Yang, C. Cen, G. Fu, B. C. Gates and F. S. Xiao, *Nat. Commun.*, 2018, **9**, 1362.
- 16 H. J. Wang, Y. Wang, Y. F. Li, X. C. Lan, B. Ali and T. F. Wang, *ACS Appl. Mater. Interfaces*, 2020, **12**, 34021-34031.
- 17 X. H. Sun, A. I. Olivos-Suarez, D. Osadchii, M. J. V. Romero, F. Kapteijn and J. Gascon, *J. Catal.*, 2018, **357**, 20-28.
- 18 Y. B. Hu, K. Tao, C. Z. Wu, C. Zhou, H. F. Yin and S. H. Zhou, *J. Phys. Chem. C*, 2013, **117**, 8974-8982.

- 19 F. Q. Leng, I. C. Gerber, P. Lecante, S. Moldovan, M. Girleanu, M. R. Axet and P. Serp, *ACS Catal.*, 2016, **6**, 6018–6024.
- 20 Q. S. Zhang, J. H. Bu, J. D. Wang, C. Y. Sun, D. Y. Zhao, G. Z. Sheng, X. W. Xie, M. Sun and L. Yu, *ACS Catal.*, 2020, **10**, 10350–10363.
- 21 R. Antony, R. Marimuthu and R. Murugavel, *ACS Omega*, 2019, **4**, 9241–9250.
- 22 K. J. Datta, A. K. Rathi, P. Kumar, J. Kaslik, I. Medrik, V. Ranc, R. S. Varma, R. Zboril and M. B. Gawande, *Sci. Rep.*, 2017, **7**, 11585.

## Optimized geometries

The optimized geometries of each state reported in the manuscript are given in coordinates (with atomic positions in Å) below. The coordinates are in the VASP POSCAR format.

For FeN<sub>4</sub> catalyst

Structure-I

1.0000000000000000

14.7791996002000001 0.0000000000000000 0.0000000000000000

7.3866954629999997 12.8008386819000002 0.0000000000000000

0.0000000000000000 0.0000000000000000 18.0000000000000000

C N Fe H O

72 5 1 6 2

Direct

0.1666759579560509 0.9994179008584916 0.1654482495166846

0.0550997534068442 0.0564572550763372 0.1666367942736225

0.3324725115412555 0.9994133762973396 0.1662789319317078

0.2215547828317000 0.0556022912134628 0.1663971557682249

0.1655860797693601 0.1673780368170621 0.1668407250501704

0.0549675008936985 0.2237372182596386 0.1676074533824925

0.3310525587660063 0.1679274114127862 0.1662966342962768

0.2201844218761931 0.2236176990646781 0.1662645239872009

0.4979816189215297 0.0029925955738546 0.1667295962597233

0.3870755255681060 0.0566029863460208 0.1666230592510740

0.6634660085263429 0.0062992841179183 0.1667624783850000

0.5523915492933897 0.0605158688477493 0.1669087398739586

0.4959592181781766 0.1724062262389772 0.1667218180723496

0.3851513009367766 0.2248232722166423 0.1658992090524020

0.6610265771273073 0.1777443073856445 0.1698575180791423

0.5471778965392263 0.2335061685522659 0.1676185725628823

0.8290891564982878 0.0062313182501130 0.1672137854829106

0.7174017646403534 0.0639436557423599 0.1677158036508755

0.9982562315491956 0.0025677930236065 0.1658323074834253  
0.8863022287753416 0.0598662179472244 0.1672535756298514  
0.8308394953153417 0.1716086968160666 0.1709401499674133  
0.7202805470762690 0.2284589683625196 0.1742475610334325  
0.9991995674950856 0.1683183178590266 0.1687820872795339  
0.8890099512485721 0.2248529237262309 0.1717824858390013  
0.1642148512324679 0.3349846463290302 0.1659483682504187  
0.0539077291867705 0.3913106406663238 0.1665648066017112  
0.3282095657780596 0.3358459235470748 0.1643609032206010  
0.2179034109810936 0.3916169001393989 0.1646728307410486  
0.1625144649953573 0.5025420721975195 0.1640855205657344  
0.0522966776044045 0.5590676177864631 0.1659576468213419  
0.3265759305930879 0.5033998636265620 0.1608227739072771  
0.2170073342995448 0.5582888008940710 0.1614664379414131  
0.3828123725763993 0.3910679271986101 0.1631469563362350  
0.6691398254998409 0.5032475096735641 0.1702980271511800  
0.8345591225795823 0.3365966853287384 0.1718087604945217  
0.7262030612918832 0.3934961609413801 0.1755283394973604  
0.9998419913555751 0.3350132454467887 0.1671123480805737  
0.8895535161815157 0.3918910611567584 0.1680306527895256  
0.8339001896939273 0.5028406185977863 0.1680872844453112  
0.7237917738700087 0.5588329605232621 0.1683760601560157  
0.9981116183973886 0.5029274325847770 0.1669087938681208  
0.8878269020850522 0.5593475296812683 0.1675111469153301  
0.1630100679332115 0.6693078088397437 0.1614429202050884  
0.0522516740071751 0.7259766272900960 0.1641611504526427  
0.3334412307351715 0.6614119687378449 0.1605543390633852  
0.2211236654158309 0.7217913179326423 0.1603993562358701  
0.1660292859828089 0.8334319939271130 0.1620782931768709  
0.0541838072696524 0.8908701529632141 0.1640108659753963  
0.3348808580186755 0.8291131721481794 0.1637093380332621

0.2229656018210988 0.8873888827983580 0.1633659487480932  
0.5041692796993694 0.6612269527964005 0.1652351390771362  
0.3915478233051117 0.7158331805291351 0.1628094208490591  
0.6666549774906253 0.6695264531554235 0.1669403864309898  
0.5558029264576690 0.7220087042530453 0.1662010075726139  
0.4992928511278238 0.8335411224488780 0.1661513457989998  
0.3883108003277355 0.8874697513947181 0.1655814420349379  
0.6646241980347231 0.8375241248552774 0.1662694386006538  
0.5538028948120108 0.8911596800229289 0.1665035945623133  
0.8316864466066537 0.6705017962960869 0.1671373598509024  
0.7207989065729571 0.7261792779513893 0.1665989410951643  
0.9969265714286542 0.6704472964029904 0.1660302580738618  
0.8863128517747122 0.7266266684745311 0.1668582113385259  
0.8303747609952741 0.8383263893217183 0.1666739601876142  
0.7192704064057175 0.8944963413832233 0.1663622578754145  
0.9969998142028618 0.8372182035588515 0.1649749095709289  
0.8854304831548706 0.8940722132102794 0.1665253664951925  
0.2297723864238300 0.7805123527396315 0.3454577626286522  
0.3378875479238411 0.7175694668302193 0.3406896999132312  
0.3809186369005598 0.6089831814925120 0.3341468742068045  
0.3172520249036022 0.5634914609576093 0.3346808926420483  
0.2095709172189379 0.6276016302030829 0.3409151863029638  
0.1653003922487937 0.7361871415881797 0.3453989543496684  
0.4893294840221171 0.3406427688636504 0.1653349345692324  
0.6689788297830495 0.3402434501368479 0.1898484044432113  
0.3821759480641285 0.5542858307568794 0.1605344039230160  
0.5620081508562107 0.5542069260515664 0.1667663675802274  
0.4910831013067781 0.5437378914464838 0.3236585927599821  
0.5237113390224715 0.4499419920385723 0.1709914583973925  
0.1951187410660302 0.8652969310873804 0.3479493821877307  
0.3894408523473422 0.7504621712523968 0.3396387225705278

0.3535675273092193 0.4790088178597822 0.3296238027082877  
0.1598046163233395 0.5925116010208857 0.3411215150596086  
0.0805625559225309 0.7861263461638378 0.3479240558104760  
0.6492649813852944 0.3511101899998512 0.2462792891145520  
0.5230610147801178 0.4504957621305001 0.2979257774566000  
0.5522665376790358 0.5778657473627039 0.3352618851778111

Structure-TS1

1.0000000000000000

14.7791996002000001 0.0000000000000000 0.0000000000000000  
7.3866954629999997 12.8008386819000002 0.0000000000000000  
0.0000000000000000 0.0000000000000000 18.0000000000000000

C N Fe H O

72 5 1 6 2

Direct

0.1616553455092094 0.0047734502232222 0.1692716524675541  
0.0500052240196565 0.0618704946755449 0.1721900670795928  
0.3274745498578672 0.0047420680479348 0.1677599552081931  
0.2165540574414030 0.0609216576322755 0.1687574872357047  
0.1605331015640369 0.1726928482884365 0.1690970914115420  
0.0499439756902708 0.2290604143852484 0.1718991697331807  
0.3259988076103742 0.1731080000703848 0.1660236864108427  
0.2150591183969265 0.2288546810604178 0.1666172553186540  
0.4930685477689567 0.0082767791048225 0.1685879469132881  
0.3821473387993393 0.0618535746589252 0.1674840734222945  
0.6585497666292297 0.0118445914468149 0.1711642244758692  
0.5474131567214700 0.0658056379826316 0.1693806641073716  
0.4908722580706707 0.1774252837973049 0.1672975612521908  
0.3801233128499336 0.2299554244086432 0.1646294408138275  
0.6555352826902224 0.1837447265116873 0.1751173420586023  
0.5421499015113301 0.2384980386017552 0.1685944032517460

0.8239575050419309 0.0117756751723174 0.1733478453040862  
0.7122613586100649 0.0698054991444400 0.1734372524835436  
0.9930134756994919 0.0081364257164651 0.1719359056323559  
0.8810340977667211 0.0656116424907514 0.1745233809185728  
0.8257128430559502 0.1772072386405341 0.1787875380388744  
0.7141549836050211 0.2359786023397689 0.1815619950677355  
0.9943306950128712 0.1735706838807714 0.1746976590598787  
0.8839457008353807 0.2302227332629716 0.1787373793926730  
0.1590090622651102 0.3401832700609175 0.1656015757768132  
0.0487843723466107 0.3965829376967503 0.1681858394220208  
0.3228755592716557 0.3409834452772114 0.1616064873928743  
0.2125609789381167 0.3968057799815916 0.1623116628333369  
0.1572146400166149 0.5076713280160022 0.1614103634690804  
0.0471071195962614 0.5643910280335621 0.1649692002935245  
0.3209970237642931 0.5085137214728590 0.1574972082756131  
0.2116558641129233 0.5635473870499993 0.1585853269950032  
0.3772350260329908 0.3961602802437661 0.1596207420664108  
0.6644718067154275 0.5087487284325989 0.1762561699776465  
0.8297349404819064 0.3419073539859697 0.1788767429254260  
0.7210663291922077 0.3981739181667516 0.1821159063311185  
0.9947716464758586 0.3403365331109585 0.1715309312345387  
0.8846111824585006 0.3972744547958687 0.1743871025469216  
0.8291276573604845 0.5081000042026382 0.1736204522315066  
0.7189400432904184 0.5639967939835808 0.1742072679248918  
0.9930638878239726 0.5081949096461053 0.1680284946392435  
0.8828335296822221 0.5646852778591025 0.1707388739034922  
0.1578202099502402 0.6747327896090509 0.1607678763726820  
0.0471397964770081 0.7314395314481108 0.1646925413525852  
0.3279995255753871 0.6670960009866013 0.1607198727003665  
0.2158107636426574 0.7274232335009631 0.1614524601086966  
0.1607978437881983 0.8389377934446005 0.1653535884904235



0.0490046255712441 0.8964181783365964 0.1683304817565406  
0.3298206047841649 0.8345054378610995 0.1657579893190970  
0.2178768747536542 0.8928256475073595 0.1666421912691224  
0.4991503377825901 0.6668271178984255 0.1678650832693681  
0.3864921326674431 0.7211236420009832 0.1642231733931470  
0.6617340154649711 0.6748863911136822 0.1714117511738401  
0.5508614101414123 0.7274718815003379 0.1694417928276322  
0.4944228821085731 0.8389189199664860 0.1684679974624970  
0.3833295001836845 0.8927951233142779 0.1673743540322012  
0.6596844114197175 0.8429452637987390 0.1702046181181499  
0.5488838087112009 0.8964981088832303 0.1692787480296205  
0.8268000836179814 0.6758582340091347 0.1703636237958187  
0.7158337174593493 0.7315959237893804 0.1708000863537108  
0.9918724214746869 0.6757863568898452 0.1661292414666819  
0.8813192183243536 0.7320288462056648 0.1690205858644741  
0.8254101201116250 0.8437767415675411 0.1702790291341263  
0.7143388895133517 0.9000046983177991 0.1707304867189135  
0.9918803455433183 0.8427122599777116 0.1680367822880463  
0.8802789515547481 0.8996976251310969 0.1707320660049693  
0.2545000825004158 0.7632252644954440 0.3486015221280259  
0.3618036235348405 0.6953848436091564 0.3434120573878816  
0.3997239848600314 0.5874831871151164 0.3348541112630782  
0.3301105153857477 0.5484643758884219 0.3333342083316222  
0.2233081407797022 0.6176343929100025 0.3397239129037444  
0.1846952598913639 0.7251379229094342 0.3468015663499684  
0.4839531584176376 0.3451308319582482 0.1630814787958089  
0.6641757137550377 0.3458881217192695 0.1914067610205731  
0.3765117549523905 0.5598361899176214 0.1585276869936835  
0.5573104444967341 0.5598417192218239 0.1704467763845411  
0.5084138537739776 0.5191985643940978 0.3261047866073158  
0.5185002297591549 0.4547495561978728 0.1702596317828977

0.2245439606801763 0.8471837464195935 0.3528856850616461  
0.4168644973539007 0.7240672355821912 0.3436521206509813  
0.3607443741568777 0.4649261446057006 0.3269244627864725  
0.1694312590147051 0.5873065158000553 0.3382767420260000  
0.1006085214588716 0.7789397339094555 0.3500421528795381  
0.6152560374963759 0.3782540522641633 0.2523622207790825  
0.5361441564717015 0.4226275256896140 0.2987336096929398  
0.5752524170028366 0.5469260196630742 0.3349479627738680

## Structure- II

1.0000000000000000

14.7791996002000001 0.0000000000000000 0.0000000000000000

7.3866954629999997 12.8008386819000002 0.0000000000000000

0.0000000000000000 0.0000000000000000 18.0000000000000000

C N Fe H O

72 5 1 6 2

## Direct

0.1669330576812723 0.9988636311827942 0.1662196456331539

0.0552188537686396 0.0561332063097655 0.1672387448723940

0.3326385557861624 0.9989258696409228 0.1662771853820656

0.2216860216919857 0.0550984967245695 0.1666984182319732

0.1658660555365094 0.1667850012585370 0.1676523477081277

0.0551866197439166 0.2231547738341643 0.1687380059905570

0.3310951334300815 0.1675166887378672 0.1665043902990665

0.2202137571519779 0.2231261308807493 0.1672138593509440

0.4979962035970651 0.0025341551710909 0.1669992232859962

0.3871278493608803 0.0561709791998372 0.1665950601796039

0.6634559083204045 0.0062119052129687 0.1677907620022842

0.5524236827084462 0.0600855137330111 0.1670836171218454

0.4959166564922947 0.1716667287862578 0.1659453143124157

0.3850754915469322 0.2243809480004837 0.1656304922134000

0.6603194400349207 0.1779007823041561 0.1670669865122687  
0.5475998090790386 0.2322825345683171 0.1653091841029253  
0.8288847991716120 0.0061832981681029 0.1678558171209566  
0.7170337799365121 0.0645022714194258 0.1677635499588404  
0.9980332396967700 0.0024662772509789 0.1669329639533144  
0.8860076506730781 0.0600882675748147 0.1678445036984839  
0.8309387536504155 0.1716717168772207 0.1684995536116517  
0.7186458449742195 0.2321738145562290 0.1678781620180975  
0.9999003023023090 0.1675330530587286 0.1686393384805338  
0.8890966450586417 0.2244203184874141 0.1692743621716556  
0.1641585915366791 0.3344580078705534 0.1673015201699089  
0.0538423204894366 0.3909316566441245 0.1686899848236529  
0.3278722319065075 0.3355494497415413 0.1643598987912239  
0.2174696451332711 0.3913230813025654 0.1654365332525027  
0.1621088031122595 0.5021231136419854 0.1646574333178548  
0.0519676526405729 0.5589397296377683 0.1668645400708903  
0.3260530074151489 0.5026849981697185 0.1606975317015164  
0.2167188429524269 0.5578704795601891 0.1618655561904666  
0.3819942131651657 0.3907604441813574 0.1623464671335868  
0.6697634332183307 0.5027335395380375 0.1679258226982563  
0.8351527965464438 0.3356176798442775 0.1699354938452277  
0.7257846881352104 0.3908962498871743 0.1688864280220896  
0.9999676733470440 0.3344624150360622 0.1695506163908737  
0.8898008757784233 0.3913725437108319 0.1703061675750765  
0.8343475670801818 0.5021948574975394 0.1703204348080145  
0.7239488878127827 0.5579270801047744 0.1693252393545145  
0.9980641690147476 0.5025310088323127 0.1687704705576692  
0.8877023880126694 0.5590442301935091 0.1698469475913730  
0.1628257717824363 0.6689556429702957 0.1621579659533060  
0.0520792730742802 0.7257771814534029 0.1648774398062023  
0.3332220880574164 0.6610573898165304 0.1609144745534376  
0.2210097579995910 0.7215591340309825 0.1615785989127625

0.1659701929509796 0.8330709695247530 0.1636274980652856  
0.0540025816743980 0.8907220593455552 0.1654056580125852  
0.3349400038367241 0.8286514069126795 0.1641057870919472  
0.2230661083315849 0.8869757893206170 0.1645116285543446  
0.5042924274068641 0.6609707510195618 0.1645901239012812  
0.3916393854305701 0.7153018202245133 0.1627549625130894  
0.6667489491157356 0.6690312459052015 0.1684947130760394  
0.5559389732934660 0.7215814692722340 0.1666401964743651  
0.4994256326867814 0.8331387036020265 0.1665374507434546  
0.3884067088989231 0.8870217036755912 0.1656167058072988  
0.6646487698646782 0.8372201602447122 0.1683230836041493  
0.5538038068458327 0.8908075747428912 0.1674180316236843  
0.8316048962128657 0.6703261284687164 0.1693971848180769  
0.7207068459399398 0.7258986222823403 0.1690208428935471  
0.9967349296636792 0.6702414561726616 0.1668008086729690  
0.8860395635790236 0.7265699556533421 0.1683591217769969  
0.8301976864354119 0.8382026521353566 0.1681737345107867  
0.7192041770674840 0.8943730574957239 0.1683208344213961  
0.9967778059292256 0.8370920951036863 0.1659620701523259  
0.8850612540674303 0.8942896885976778 0.1674982341989739  
0.2264225110488012 0.7829073017326053 0.3444390127362670  
0.3345538011534611 0.7218059195383258 0.3414460328290085  
0.3805028903085446 0.6120709606731277 0.3371186434451027  
0.3178545817925806 0.5647657663558612 0.3367546910574405  
0.2098725786494186 0.6279881265005243 0.3404082019026201  
0.1633467214162341 0.7369011414599326 0.3439694983608027  
0.4891211115035970 0.3395347672715748 0.1629672135435223  
0.6696776089134338 0.3396506192989112 0.1679154313430013  
0.3820548579900603 0.5537732279412143 0.1599490850632590  
0.5627478494924346 0.5537144631492338 0.1648535095897200  
0.4884123363460264 0.5532613471961062 0.3327484291500508  
0.5257246816410548 0.4467302738671750 0.1646834256210099

0.1906649630877539 0.8678192809512334 0.3459102330035803  
0.3848390673725015 0.7561194895220558 0.3409286277310099  
0.3539226259292319 0.4801967114038316 0.3335193146839303  
0.1611110836230218 0.5917440425879947 0.3395070320450749  
0.0784427857381586 0.7856862490532213 0.3449480146297295  
0.6039579537478033 0.4193110726371198 0.3143402587974998  
0.5284930533505035 0.4445369497363435 0.3150751473351909  
0.5534577600586618 0.5836878298198611 0.3387625594866387

### Structure-TS2

1.0000000000000000

14.7791996002000001 0.0000000000000000 0.0000000000000000  
7.3866954629999997 12.8008386819000002 0.0000000000000000  
0.0000000000000000 0.0000000000000000 18.0000000000000000

C N Fe H O

72 5 1 6 2

### Direct

0.1664241797099648 0.9991901952353505 0.1664374559373258  
0.0547294334241584 0.0564471900717911 0.1672313292164065  
0.3321999343798189 0.9992242627488708 0.1664451364677657  
0.2211833609616204 0.0554537710634810 0.1669452740732996  
0.1653596895177268 0.1671468220260181 0.1676328184437661  
0.0546391645973717 0.2235379904969894 0.1684928859748265  
0.3306192036734204 0.1677972790431679 0.1662028501161123  
0.2197401917913634 0.2234997213985307 0.1669027900613390  
0.4975490018462860 0.0028637694367644 0.1666536244652513  
0.3866911642421741 0.0564314727380972 0.1664651801559946  
0.6628926750011785 0.0066524293702252 0.1677691253157568  
0.5519255062106371 0.0605044742838983 0.1668295615090321  
0.4954186759628970 0.1721088920328040 0.1660109139119774  
0.3846191602665305 0.2246984042084226 0.1653358956445112  
0.6597071983781871 0.1784281635498713 0.1687115739309197

0.5469259360682898 0.2328900066095582 0.1670799409992422  
0.8283822530995020 0.0066349207074396 0.1679130106893388  
0.7164300950549557 0.0650497730647593 0.1682830311995818  
0.9974928773474163 0.0028360211409681 0.1667771900868780  
0.8854533444788778 0.0605277020370912 0.1676937759524724  
0.8303307973545330 0.1721655691934598 0.1684577475809387  
0.7180320048797545 0.2328502388373697 0.1693649066434597  
0.9994460733190983 0.1678394219547684 0.1683799578599866  
0.8885604325005468 0.2247682309520731 0.1687865260639314  
0.1637022549214095 0.3348549149526914 0.1667270571230139  
0.0533566193049953 0.3912868988868574 0.1681725070478498  
0.3274985863396356 0.3358193354267001 0.1640380656441338  
0.2170986140951747 0.3916192387841593 0.1647382069055451  
0.1617027244379955 0.5024528250061799 0.1640647280379836  
0.0515839320005372 0.5591728428710204 0.1664196311994396  
0.3256127501696082 0.5032214060215383 0.1619948208796594  
0.2162138647976323 0.5583008497123978 0.1617273190318054  
0.3817638382093502 0.3910568485625913 0.1635667150212574  
0.6690331065276851 0.5033271304944583 0.1676684444879459  
0.8346053755502306 0.3359109142710528 0.1690782330748370  
0.7251075178630837 0.3911656312556402 0.1690192629765978  
0.9993887527665385 0.3348896821658647 0.1689840611278945  
0.8892143221996668 0.3917072058221773 0.1693100448976692  
0.8337812688249271 0.5025606785743684 0.1692879650313956  
0.7234083736587016 0.5584177847900389 0.1682056959536755  
0.9976098344069819 0.5028064138185440 0.1682849441522160  
0.8872429426608195 0.5592665268061070 0.1692213000048595  
0.1623026375117347 0.6693514223515801 0.1620756349113446  
0.0515134940262549 0.7261758244463906 0.1646287957306438  
0.3326303687483043 0.6613969261310423 0.1623345646203418  
0.2204380871289942 0.7219595992246215 0.1617355065954805  
0.1654192136338791 0.8334749694306883 0.1635178553660172

0.0534523894154627 0.8911432401192667 0.1652217062574851  
0.3344982531305294 0.8288571250089087 0.1645028214467557  
0.2225337862085673 0.8872760825619329 0.1647074024284101  
0.5038647972477125 0.6614481535752915 0.1650717263622610  
0.3911547238532894 0.7156577733516033 0.1635538174896047  
0.6662434714382235 0.6694544918331596 0.1675964353651056  
0.5554821061248092 0.7220206200437321 0.1659628274116465  
0.4989676806684267 0.8335433539396259 0.1661150155305740  
0.3880091363363208 0.8873233101304443 0.1657643654036920  
0.6641747652881808 0.8376288913733547 0.1678498743944910  
0.5533180745045975 0.8912126884529975 0.1669431787729240  
0.8311623063937794 0.6705920302648907 0.1689274539492544  
0.7202760615548118 0.7262951599593150 0.1683929486612198  
0.9963196385445711 0.6705195653983708 0.1665465551988907  
0.8855969912433118 0.7268669759327102 0.1681501298374731  
0.8297314628706602 0.8385265720814575 0.1680590787903062  
0.7187048992731621 0.8947608471274364 0.1680924320300389  
0.9962272251019388 0.8375217066540761 0.1657778037629473  
0.8845452517868809 0.8947049036584042 0.1674154605352235  
0.2144861308243426 0.7940391980563386 0.3434357595292646  
0.3231988114435567 0.7354375400542752 0.3413005411152880  
0.3718994168125322 0.6259213056207290 0.3390389897576854  
0.3128259238404015 0.5755297121903651 0.3399227509863481  
0.2042848812419732 0.6355192533979743 0.3414122414120529  
0.1546925430737467 0.7446695788492211 0.3433714307499789  
0.4885370563264964 0.3401770895712964 0.1664332133299347  
0.6690203352449766 0.3402788875300279 0.1704664843566889  
0.3814118425356006 0.5542386545798139 0.1633722304901642  
0.5623151948940356 0.5542399712483037 0.1662497599023453  
0.4832224317463360 0.5656594761927074 0.3433978376185917  
0.5245202709454543 0.4483051976151423 0.1756991027421521  
0.1759498997623494 0.8792061794983663 0.3441225920555175

0.3710122950514507 0.7725604783414762 0.3406370573438218  
0.3527721467907723 0.4905812886572072 0.3381026589730727  
0.1579847602565044 0.5966521759501373 0.3404680698629152  
0.0695519107211093 0.7911157616416183 0.3440003681846113  
0.5926484420695609 0.4170918955989305 0.3123941870315713  
0.5200812040866004 0.4537841707127982 0.2951486197852068  
0.5389366291552504 0.6050111330977573 0.3319725741748852

### Structure-III

1.0000000000000000

14.7791996002000001 0.0000000000000000 0.0000000000000000

7.3866954629999997 12.8008386819000002 0.0000000000000000

0.0000000000000000 0.0000000000000000 18.0000000000000000

C N Fe H O

72 5 1 6 1

### Direct

0.1666497696925746 0.0000104017251107 0.1667063283450629

0.0550313160261707 0.0570171531599967 0.1680291575441584

0.3322662757091914 0.0003750611420421 0.1658204458794520

0.2215426598078768 0.0561688780848190 0.1660476180483070

0.1656952009979137 0.1678654668161697 0.1657629543932559

0.0549695700283445 0.2241063720267105 0.1675721753706363

0.3309733367744571 0.1684701389120884 0.1633653788514804

0.2201107705565754 0.2240731644182645 0.1639145192012249

0.4978360752968480 0.0036251493287532 0.1654905345219173

0.3869573197410516 0.0572339258389967 0.1650117196783604

0.6632953166571800 0.0070049991679900 0.1662555821508861

0.5523371584539165 0.0609613575507135 0.1649772597100563

0.4957670634408617 0.1725615010335731 0.1628119891801995

0.3851002510290351 0.2251679772432076 0.1612405622333245

0.6602890953597759 0.1785728382260602 0.1675726708465768



0.5477464596058438 0.2327633738855707 0.1634633431235366  
0.8287924244527944 0.0069310780993139 0.1678421328930315  
0.7169954636607651 0.0652689348402248 0.1672075220119648  
0.9979516363212566 0.0032805558957528 0.1679975118021973  
0.8859232938426629 0.0608159594246738 0.1689808122201585  
0.8309487950182346 0.1722128631660104 0.1708297268372221  
0.7187090863729885 0.2327044176256798 0.1711450797521913  
0.9997641979903792 0.1684125884047685 0.1691328806894271  
0.8890175340861312 0.2250911119895084 0.1713225388588843  
0.1640469963242564 0.3354968228053123 0.1627885220134558  
0.0537362970622827 0.3917465437052292 0.1649349966154067  
0.3279171257755073 0.3362042083307296 0.1586623281419031  
0.2176315192298996 0.3920960848911914 0.1597617412745705  
0.1621903259545542 0.5029779523246914 0.1592874490977460  
0.0519576087318374 0.5596522404942045 0.1620880888248287  
0.3264735256342755 0.5034130067762973 0.1581233679114111  
0.2167371994102376 0.5586634816396806 0.1580580776992095  
0.3825767066859700 0.3910073080813609 0.1579430954541949  
0.6724006127204053 0.5015490056020284 0.1816848951331375  
0.8354054227509415 0.3359805396561470 0.1733635294221247  
0.7253033750805993 0.3914057589263505 0.1769306856313025  
0.9999270243756470 0.3352995898633065 0.1677496264348103  
0.8895475346068953 0.3919287959724683 0.1709439405869246  
0.8342113060383313 0.5028880940615750 0.1706929913194044  
0.7239686375755741 0.5582328441229373 0.1756964230990465  
0.9979080553996208 0.5034026037241149 0.1645841570560762  
0.8875835150756846 0.5597329496250137 0.1673195422419790  
0.1629097314270898 0.6696261007990506 0.1600826840772259  
0.0519733252226136 0.7265451100874639 0.1623030329074490  
0.3331349823781647 0.6614349357512002 0.1645840466050212  
0.2211610509152440 0.7221841195214286 0.1622892197907037  
0.1658247842631191 0.8339478489322326 0.1648223651926410

0.0539743532503122 0.8914635598612307 0.1659328875049235  
0.3341636246832480 0.8305740711603052 0.1668248410760245  
0.2226477140945177 0.8882077641875848 0.1659870760312027  
0.5014010747911301 0.6666735418167921 0.1758585743442126  
0.3914708829048080 0.7167498792334189 0.1692022540684512  
0.6666696317552719 0.6699981111673610 0.1741218534679781  
0.5552152559271927 0.7233880916526417 0.1723396944252250  
0.4989546434245033 0.8348582968045797 0.1677334652734934  
0.3880833677282992 0.8883329785011344 0.1668076575110396  
0.6644691342005380 0.8381048638170708 0.1678472749008660  
0.5536992813028415 0.8920059008894703 0.1670392335540428  
0.8315583441205930 0.6709918422209494 0.1675362644068398  
0.7204492980587368 0.7263479919164683 0.1699428033366358  
0.9966786246379266 0.6709759794360577 0.1630675209038213  
0.8859062415671709 0.7272107287060027 0.1654570609986746  
0.8301577594760025 0.8388926816474587 0.1662546887148648  
0.7190835994193312 0.8950421051480679 0.1668226379847168  
0.9967040322661984 0.8377950435347707 0.1650704033534256  
0.8849479335066114 0.8949508234627523 0.1664727496965834  
0.2088442067547645 0.6466311616226695 0.3364657888224280  
0.3166623383701975 0.5849524950641787 0.3308194629746933  
0.3637269613642989 0.4748973935909208 0.3333028111478888  
0.3004338904498898 0.4289902669892368 0.3434585164619681  
0.1925415009888524 0.4915688840863681 0.3476524088399086  
0.1460946519378463 0.6006465104533966 0.3439306972225128  
0.4890890448216605 0.3398098728981170 0.1607661720936438  
0.6699575479880159 0.3395280181393538 0.1746123338278645  
0.3822621032803036 0.5541329803282636 0.1622994904668368  
0.5615838341758561 0.5564844619259618 0.1945499055414873  
0.4703104097883310 0.4051644397093481 0.3260917049425596  
0.5254638043719285 0.4443282632121964 0.1789824359259186  
0.1724261342755881 0.7316228841512427 0.3343348236931273

0.3666968241787572 0.6191790445391322 0.3245919008449649  
0.3388195041140415 0.3438599647509207 0.3457428959072237  
0.1437155990460614 0.4558324945646825 0.3534693234374369  
0.0612562585709902 0.6498257024262045 0.3467910454119573  
0.5463117434459117 0.5487505439507899 0.2504206373759457  
0.5252756038283315 0.4460249381417208 0.3008764832905469

Structure-TS3

1.0000000000000000

14.7791996002000001 0.0000000000000000 0.0000000000000000  
7.3866954629999997 12.8008386819000002 0.0000000000000000  
0.0000000000000000 0.0000000000000000 18.0000000000000000

C N Fe H O

72 5 1 6 1

Direct

0.1655943435782324 -0.0025261393156405 0.1668084990061720  
0.0539611201754501 0.0544642785671773 0.1676377568733062  
0.3312452243691166 -0.0021628633507440 0.1663649908247889  
0.2204887815267948 0.0536750800786214 0.1664725336212252  
0.1646409610054024 0.1654267173227491 0.1659838694232401  
0.0539801513725380 0.2216004915460122 0.1686438245679098  
0.3299252872591624 0.1659183548163811 0.1616117976720135  
0.2190048098153762 0.2216058747466302 0.1627571628869320  
0.4967965473288002 0.0010249689921193 0.1652570138283261  
0.3859600348796430 0.0546867276394851 0.1644721132533312  
0.6622534597427528 0.0044290466465239 0.1648047199444313  
0.5512734076088809 0.0583422793677780 0.1635624243473111  
0.4947428024584065 0.1698914715949826 0.1603520815784236  
0.3840454367104750 0.2225934374798320 0.1587006737067657  
0.6592711132747308 0.1760755757136405 0.1642558470486028  
0.5467711454585779 0.2301158144289106 0.1603308327874116  
0.8277599974479433 0.0043959323123320 0.1654995995702003

0.7159735006249653 0.0626783247457674 0.1647185256085125  
0.9969269647743417 0.0007024332680116 0.1666114502653458  
0.8849461404177902 0.0582670704191728 0.1671074947991868  
0.8299897315477818 0.1696632444479226 0.1696100300434809  
0.7177070760875504 0.2302497582503806 0.1683308732118413  
0.9987813770644037 0.1658287935832526 0.1696547916720638  
0.8880424646562566 0.2224989457865690 0.1717849783502045  
0.1628889562723257 0.3330267015288048 0.1612507910862991  
0.0526757919608891 0.3892077610261787 0.1653281518135455  
0.3267129105287955 0.3337560903524004 0.1554925440423204  
0.2163610687871245 0.3896399901582833 0.1568572857647496  
0.1609386634118171 0.5004870579452487 0.1565771583255420  
0.0507429620933342 0.5570774755047571 0.1607350682570752  
0.3251514371813629 0.5010979154927133 0.1542936145107379  
0.2155121559582046 0.5562070213248853 0.1550333778774648  
0.3812334115102110 0.3886523841282031 0.1545057245444283  
0.6706068176597382 0.4991692838931494 0.1831847042138245  
0.8344543274061358 0.3334075465986683 0.1756237368749730  
0.7245342010403271 0.3887378982370353 0.1775829220626534  
0.9989281070804622 0.3327868322994710 0.1696181377305116  
0.8886599007032580 0.3893839027429976 0.1742214780354748  
0.8331711576289244 0.5002764608455428 0.1745796861914290  
0.7227715507098031 0.5556517446257239 0.1791998612043457  
0.9967866906834464 0.5008309403465567 0.1651572749989791  
0.8865175971293329 0.5570975837292383 0.1698857199778016  
0.1617152833512291 0.6672102841614415 0.1576421408503578  
0.0507591064761761 0.7240630706188876 0.1602419623797318  
0.3320969930111899 0.6589331817095330 0.1620035857943354  
0.2199248159073096 0.7197806831187420 0.1602513445461096  
0.1647174868586805 0.8314093795563342 0.1636514553393873  
0.0529086884433244 0.8889131252747448 0.1642184739348790  
0.3331178016349680 0.8280502399266427 0.1675232482638638

0.2215851454469904 0.8856794108681448 0.1658955690031832  
0.5004900914494729 0.6633962297140088 0.1760305676775306  
0.3903608454145061 0.7142466362158482 0.1686955513040919  
0.6654410991419987 0.6674147435429656 0.1769780814462708  
0.5540760277183994 0.7207669054954485 0.1747218920495836  
0.4978975263911354 0.8321846576026292 0.1698987389940064  
0.3870318200960408 0.8858050166222489 0.1681877522919959  
0.6632897471353036 0.8355741509889045 0.1692529022472900  
0.5525564187499932 0.8894223745033749 0.1683521274220923  
0.8304592126767988 0.6683514997708658 0.1696111734279861  
0.7192791702937457 0.7238432163698831 0.1724622374567384  
0.9954793101815873 0.6683884504154887 0.1618182357467973  
0.8848000074236689 0.7245725277187007 0.1656543213720793  
0.8290609376819732 0.8363417990642172 0.1656303586482576  
0.7179941190330474 0.8924903976170401 0.1666533966075314  
0.9956118361404950 0.8352908074900652 0.1629260606806543  
0.8838472703632211 0.8924459438142343 0.1645294283075162  
0.2104572111312026 0.6566754096911441 0.3357018313663461  
0.3187620859738424 0.6006180781884997 0.3300833711334817  
0.3716339111731662 0.4900308182710478 0.3306153816640732  
0.3130945293556823 0.4383037394059502 0.3372681370950842  
0.2048657028861351 0.4953291558838067 0.3419395906953641  
0.1529035443130259 0.6049004434680192 0.3412712785045346  
0.4879297616342785 0.3372170921945986 0.1574794556392927  
0.6691823752097981 0.3370939439450518 0.1706611852988912  
0.3808946030492255 0.5520692905374667 0.1572774468329360  
0.5595611036437425 0.5531853999558980 0.1899346046073179  
0.4790719503966333 0.4240255563829701 0.3254300131770201  
0.5257126046106314 0.4420483783066995 0.1666550211298920  
0.1694452234483642 0.7420129788188499 0.3352176013032111  
0.3644129950132879 0.6399267885503501 0.3258788307496973  
0.3557924189175976 0.3529705636054390 0.3378103640910829

0.1602517521350701 0.4548352541680463 0.3460742930705138  
0.0678314264223500 0.6498294097609310 0.3450338437482766  
0.5366936591144580 0.5377463777561162 0.2454153427017678  
0.5348256537302483 0.4676702563022023 0.3086074753775496

Structure-IV

1.0000000000000000

14.7791996002000001 0.0000000000000000 0.0000000000000000

7.3866954629999997 12.8008386819000002 0.0000000000000000

0.0000000000000000 0.0000000000000000 18.0000000000000000

C N Fe H O

72 5 1 7 1

Direct

0.1536969799497573 0.0039544037562422 0.1669665412150994

0.0421433898978743 0.0608249919730845 0.1678336695634352

0.3194748007237784 0.0043058617714571 0.1657743047211314

0.2086977002017859 0.0600704671860126 0.1662431053508882

0.1529028038111636 0.1717958370062360 0.1660770575538626

0.0421943173792964 0.2280127459820791 0.1678078538824168

0.3181679254799560 0.1724163519630954 0.1629509511249975

0.2072669555519131 0.2280661143260384 0.1639796952026906

0.4850010820394644 0.0074659648771130 0.1657276416574932

0.3741939422398807 0.0611280393959928 0.1646252721825151

0.6503745797941439 0.0108118792070828 0.1671661630465495

0.5394176065497494 0.0648326476767748 0.1654527877755783

0.4828478247690260 0.1764288814150497 0.1630591973685955

0.3722083235734230 0.2291509134269332 0.1611076801467443

0.6475069073856839 0.1822975998645825 0.1672732263821091

0.5348769392480199 0.2366139718156293 0.1639090540882446

0.8159839142561519 0.0107237996198914 0.1681079795121400

0.7042084465016103 0.0689362345990850 0.1674994779268285

0.9850865057647439 0.0070921790574819 0.1677719867218255  
0.8731004261280902 0.0646115923968365 0.1682408968566629  
0.8181819612484225 0.1759736502514662 0.1695025771830960  
0.7059760397573653 0.2363966888294947 0.1699867341186393  
0.9870278303384569 0.1722163892288713 0.1686482706234496  
0.8763384343695371 0.2287938709502541 0.1701279068177699  
0.1512095250028265 0.3394879216623365 0.1631557613664853  
0.0410391858115838 0.3955665149773837 0.1658859246007922  
0.3149728198312046 0.3402194220384826 0.1588226161562213  
0.2047439650496294 0.3960962176587782 0.1602417526906887  
0.1492772348878319 0.5069169801482909 0.1606072702146281  
0.0391584330165850 0.5633762069385532 0.1640404023499279  
0.3133135530060880 0.5077314113368923 0.1602921648793193  
0.2036022702024436 0.5627957567810105 0.1602381928948293  
0.3695171072071601 0.3950475184629845 0.1593421141339163  
0.6597827139420275 0.5051068991278120 0.1819663603932799  
0.8229144660841289 0.3396386390111001 0.1725869599467287  
0.7127992981601160 0.3951510840383501 0.1759474590257951  
0.9872386600722625 0.3391649858369771 0.1683675800868832  
0.8769019133164639 0.3957098925089921 0.1713759416950967  
0.8214669604134326 0.5066794314657359 0.1720351860724860  
0.7112236362440844 0.5620800344211491 0.1772114841884335  
0.9851967069005046 0.5071066570822952 0.1663320416357013  
0.8749050019370823 0.5634535027052705 0.1693793126188684  
0.1497626899954673 0.6737354095334562 0.1627100130627363  
0.0389263006862307 0.7305417676924492 0.1648936710807493  
0.3198615671486910 0.6658358171967899 0.1662115257964589  
0.2080423530282729 0.7263219412123610 0.1646413908358173  
0.1527137754235905 0.8380316482105632 0.1662264925734175  
0.0409906926327580 0.8954039898969723 0.1669018510123381  
0.3212186247340572 0.8346945137564478 0.1671418176185094  
0.2096085762334043 0.8922225779806318 0.1665590331774665

0.4882301700813772 0.6708945690207413 0.1764556758374163  
0.3784399399086804 0.7209943203780362 0.1696731849750920  
0.6537923603400233 0.6738853120024165 0.1762478749139058  
0.5422644842425947 0.7272811793458797 0.1739163491888985  
0.4861675825568199 0.8387568893416580 0.1686713250858735  
0.3753451838851803 0.8922700736066235 0.1670624733275647  
0.6515007724742826 0.8420270014330654 0.1698228917785033  
0.5408270258485155 0.8959095888444943 0.1680332671025921  
0.8187061581537803 0.6747241395311298 0.1702237767120787  
0.7075251559600187 0.7302506957563355 0.1724722076577173  
0.9837820254290475 0.6747412645506526 0.1656961400196637  
0.8730361714060101 0.7309719789809784 0.1682831533513779  
0.8172809410528716 0.8427538517809476 0.1686105955033740  
0.7061770601879754 0.8988576264339524 0.1685970844448437  
0.9837346256598739 0.8418065205845717 0.1668503396654144  
0.8721089021458086 0.8987820623499667 0.1680325736200572  
0.1751631617650620 0.5057202857497306 0.3522302155237798  
0.2437198387550019 0.5434113558134933 0.3450112348693281  
0.3535908530728321 0.4731060060776308 0.3369490327615387  
0.3893569385247955 0.3636083360581155 0.3363185110348061  
0.3189213013787398 0.3279823141661883 0.3438431449382944  
0.2115125916726385 0.3977716840759544 0.3515602864953603  
0.4760567730923043 0.3437040550934075 0.1622133339603437  
0.6573463872071375 0.3433143194688952 0.1730262549081069  
0.3686825593447692 0.5586958746225305 0.1643042503311392  
0.5485573364930972 0.5598919300922800 0.1957030453134030  
0.4136781092587516 0.5181102979014314 0.3313299202608361  
0.5132708376177604 0.4486941470544103 0.1751196192378079  
0.0917006932078266 0.5609146629819588 0.3583110792524454  
0.2155448218655220 0.6272458491612417 0.3455898420833589  
0.4726201376325218 0.3087381101568920 0.3305527056088352  
0.3481745124934294 0.2438766566399384 0.3435659234297496



0.1569780800089659 0.3687204415306714 0.3572434083796175  
0.5616657722346325 0.4554865057300251 0.3497359178664464  
0.5359937516991730 0.5558931397264614 0.2521047670951040  
0.5220329654149407 0.4360386466984255 0.3165142783350246

Structure-TS4

1.0000000000000000

14.7791996002000001 0.0000000000000000 0.0000000000000000  
7.3866954629999997 12.8008386819000002 0.0000000000000000  
0.0000000000000000 0.0000000000000000 18.0000000000000000

C N Fe H O

72 5 1 7 1

Direct

0.1543697167520053 0.0050055399115312 0.1632371286922069  
0.0428211004343757 0.0618893874703798 0.1646445602371733  
0.3200749703015802 0.0053619692224034 0.1626795628584571  
0.2093186113259856 0.0611357460370998 0.1623718664363293  
0.1534957865335241 0.1728256451361616 0.1617328888420876  
0.0427723738274093 0.2290289014954986 0.1636524712620304  
0.3187434145410745 0.1733732967418250 0.1604373830808979  
0.2078480731988180 0.2290487632790671 0.1599890841968436  
0.4856387224082140 0.0084950693424515 0.1641602574022066  
0.3748047507311392 0.0621369942590871 0.1623283025582726  
0.6510837490678907 0.0118310946085922 0.1663795406576181  
0.5401465170115682 0.0657504079398131 0.1646206844909867  
0.4834984220176586 0.1773045198329758 0.1627192971882391  
0.3728502954043759 0.2300609528975614 0.1600902781764075  
0.6481084856786182 0.1833729105180042 0.1673668923231281  
0.5354148285238358 0.2375206321787917 0.1642793094810062  
0.8166362409283910 0.0117589571204820 0.1670307421042774  
0.7048389328776408 0.0700170139970652 0.1670646229402147  
0.9857989949192032 0.0081259133599027 0.1655007262735453

0.8738164471698698 0.0655891525856066 0.1671171615135918  
0.8188990429352472 0.1769265708762407 0.1687205034570002  
0.7066950790387503 0.2373719675545362 0.1697296684637288  
0.9876303516462248 0.1732781371503903 0.1655182320397257  
0.8769517706237590 0.2298642548737533 0.1683022680068172  
0.1517281222913739 0.3404701401316702 0.1590751274815631  
0.0414689191368150 0.3966544319095946 0.1611838999860310  
0.3155347929504226 0.3411675062322436 0.1580897811449151  
0.2052656760827948 0.3970824575062307 0.1577480055041145  
0.1498132586342271 0.5079470744549761 0.1582370324100914  
0.0395829655804088 0.5645312173867436 0.1601699522376940  
0.3139328697134160 0.5085941613630484 0.1595746060343639  
0.2042391506322867 0.5637197976121671 0.1588343217733285  
0.3700336388787033 0.3960022719691951 0.1594649072017826  
0.6602659717342689 0.5063027998369486 0.1801925264298956  
0.8234575671336649 0.3407282457559703 0.1706347208744773  
0.7133492409182927 0.3962598694413785 0.1748205150090178  
0.9877334621931998 0.3401866882256011 0.1640306037618102  
0.8774112738509383 0.3967592551829754 0.1680002922299713  
0.8219424691645607 0.5077532587856521 0.1686253294533828  
0.7117729169673888 0.5631320409838746 0.1743912791490146  
0.9855981178313735 0.5082488133649327 0.1617688568205312  
0.8753318286369210 0.5645467836722148 0.1653614702918088  
0.1504097011553666 0.6746729219343379 0.1605396924002260  
0.0395470625057522 0.7315138220623529 0.1618277975934546  
0.3206230772588884 0.6665526449277070 0.1640450321661470  
0.2087069511256281 0.7272503241379816 0.1623089075283389  
0.1534591573308066 0.8390177555738352 0.1633160055514011  
0.0416978317580295 0.8963957024982123 0.1642167261069054  
0.3218358989399375 0.8357094171140174 0.1641464611831602  
0.2102876425523658 0.8932465696426627 0.1632925184729163  
0.4887686814681470 0.6721598551132869 0.1729120879263385

0.3790245928300551 0.7220389622119340 0.1668583555124002  
0.6543758371592838 0.6748819083642942 0.1730133438654576  
0.5428616337476763 0.7284460386832718 0.1705756212339578  
0.4867148430600153 0.8398668507214775 0.1659171857144634  
0.3759073999790415 0.8933310476666313 0.1641402859504505  
0.6521949381140602 0.8430452575428152 0.1676179164726680  
0.5414736821963508 0.8969431516869072 0.1659631739484662  
0.8193097974562805 0.6757724577852225 0.1667968375689410  
0.7081786107098462 0.7312210858351159 0.1694583030702129  
0.9843129310020656 0.6758352301911935 0.1619911479040009  
0.8736436010184097 0.7320259223456840 0.1649156463038026  
0.8179556901923613 0.8437419501786182 0.1661954255129814  
0.7068947235771432 0.8998774666626074 0.1669521069065949  
0.9843902263044439 0.8427789287447796 0.1640587989605316  
0.8727416518969343 0.8998098070325098 0.1658180730107483  
0.1623317411580583 0.5802142662880451 0.3715314819549664  
0.2442384919894827 0.5963651267694254 0.3528940320248505  
0.3477056149010068 0.5097876673282310 0.3431720512069944  
0.3624173915251596 0.4071485974597790 0.3518943104415955  
0.2791736080625678 0.3932824893415077 0.3712767833718958  
0.1784825365367782 0.4788151159600489 0.3814106705209483  
0.4764907156017924 0.3445471348115767 0.1630079058599948  
0.6579796816533582 0.3442984143466154 0.1725602439151743  
0.3694042757024669 0.5595174075790044 0.1626148641188769  
0.5487340121357929 0.5614807643686209 0.1921623653122349  
0.4236202829282008 0.5330238073050010 0.3276554910846228  
0.5138576253911271 0.4492889157370081 0.1746358652954589  
0.0840681510570775 0.6474942375838219 0.3788446832807925  
0.2312822221402377 0.6753137218293386 0.3455423643042530  
0.4404494191543001 0.3400495219491685 0.3451614669634291  
0.2932133348190744 0.3139893987110218 0.3794502011560227  
0.1140128041686803 0.4667823830619960 0.3973465287345159

0.5742255260230759 0.4428656418073214 0.3336343872859056  
0.5318900834591449 0.5598005715243093 0.2480122175968255  
0.5199747025560570 0.4347200583102871 0.3088539950958005

Structure- V

1.0000000000000000

14.7791996002000001 0.0000000000000000 0.0000000000000000  
7.3866954629999997 12.8008386819000002 0.0000000000000000  
0.0000000000000000 0.0000000000000000 18.0000000000000000

C N Fe H O

72 5 1 7 1

Direct

0.1542334817173517 0.0036686920348406 0.1690884377111209  
0.0425121744301118 0.0608072116234367 0.1699905667183699  
0.3200103464016485 0.0037569042002377 0.1687389035557253  
0.2090426803870630 0.0599115471627283 0.1693474910794600  
0.1532188945383076 0.1716210817357922 0.1698815442741881  
0.0424989168552921 0.2278928308641157 0.1711318427619420  
0.3185463713947552 0.1722196047377972 0.1676732539990693  
0.2076428078886635 0.2279309726380063 0.1685949457925407  
0.4854396731817304 0.0071796408447754 0.1685543777089694  
0.3746075404518068 0.0608835783407225 0.1683512198110880  
0.6508393284484678 0.0107881768764352 0.1693821551952438  
0.5398578873555276 0.0647019024145182 0.1683553454725135  
0.4833155085397648 0.1762963575124774 0.1670339859891615  
0.3725376095135602 0.2290403075422286 0.1663492389840767  
0.6476791139289215 0.1824860693406771 0.1693139435665756  
0.5349677136007197 0.2368905208098348 0.1672246223883650  
0.8162919370233881 0.0107504270958352 0.1699652798382879  
0.7044089337921829 0.0690896011042276 0.1696874065650989  
0.9854056637947488 0.0070765916702156 0.1694641759181736

0.8733890412591405 0.0646559036569183 0.1701824303742616  
0.8183127410565157 0.1762349346155046 0.1709005297084147  
0.7060172425172293 0.2368049171472884 0.1704595156931871  
0.9872585608176493 0.1721735681510181 0.1712428899332760  
0.8764619654242629 0.2289489197330300 0.1716871734723963  
0.1515667761702850 0.3392215862337419 0.1682352522533125  
0.0412844652342393 0.3955799647068807 0.1702168272413656  
0.3152945059778081 0.3402080495760212 0.1648519751333699  
0.2049286304428124 0.3960358072678701 0.1658332243025503  
0.1496085680434629 0.5067923749949722 0.1653763272275414  
0.0394822567527517 0.5634902656639950 0.1681200748442614  
0.3134459223344351 0.5074279406335592 0.1622934892022840  
0.2041060210555209 0.5626195002882348 0.1630831356288184  
0.3694201456374382 0.3954730929017954 0.1637470640386678  
0.6573856072701315 0.5072104930585004 0.1704527343807922  
0.8225903957855680 0.3401187821470214 0.1721807682001507  
0.7131683026210630 0.3953884312721935 0.1714622745893373  
0.9873900221659734 0.3391375836300631 0.1716310500543753  
0.8771959586826471 0.3958990458723682 0.1724084187464355  
0.8218655527778145 0.5066713978243212 0.1722839874716325  
0.7115083865102854 0.5624724215534261 0.1713084669666522  
0.9855796818570088 0.5070828375873822 0.1703191619154890  
0.8752537963478030 0.5634810686129924 0.1717151705441323  
0.1502452155180128 0.6736943958548522 0.1640691313852601  
0.0395028613424634 0.7304327622385322 0.1666317845506025  
0.3204208252214166 0.6658297004066416 0.1636552381214003  
0.2082391417236367 0.7264079637557170 0.1640531321104643  
0.1532377989751713 0.8378804857199444 0.1662636561042151  
0.0413425738089017 0.8954132952578707 0.1677738802607538  
0.3221551222496736 0.8335881495916835 0.1672722169408862  
0.2103000695440139 0.8918073675083200 0.1674554308444221  
0.4915939998219823 0.6659899630400544 0.1674824473388645

0.3788487020228209 0.7201797592892375 0.1660818979614125  
0.6542091479390724 0.6736670428750987 0.1704884228915422  
0.5433492608580563 0.7264969003890710 0.1689114136489588  
0.4867668489027967 0.8380287461509965 0.1687831915878851  
0.3757468119570153 0.8918622776556495 0.1683149575267085  
0.6520532959489773 0.8418092355337330 0.1701681508253181  
0.5412276251333151 0.8955335723586475 0.1692699059247459  
0.8191416151003041 0.6747147421874099 0.1713181904015936  
0.7081841563702627 0.7304391973663095 0.1709700082524083  
0.9843041038502413 0.6747475368440726 0.1684192319533864  
0.8735814320537593 0.7310026957039036 0.1702631271796786  
0.8176778797497938 0.8426935453369816 0.1701539329194078  
0.7066343463031560 0.8989232908991579 0.1701268040906186  
0.9842255008748265 0.8417016537721421 0.1679828983747362  
0.8724927411837444 0.8988553677554407 0.1695382060114146  
0.1744237114871774 0.7868949942029374 0.3509491475693663  
0.2824814041948535 0.7335729725424173 0.3423684883874986  
0.3375302848131266 0.6239660992517642 0.3371812861939494  
0.2834539912862642 0.5687739713978627 0.3409867863924519  
0.1749325884580353 0.6234712857652439 0.3493222591438312  
0.1196937275540170 0.7323111220832766 0.3541777404129227  
0.4765075174419141 0.3442150048521643 0.1655506741775951  
0.6570668623121935 0.3442209774165626 0.1709565767997019  
0.3692458659110500 0.5586814078353168 0.1624398968359105  
0.5501903545546700 0.5584933215402786 0.1683247677386810  
0.4475171993763329 0.5744756241959387 0.3309199858698531  
0.5130172936099598 0.4514549471119008 0.1700087999263807  
0.1324425879174375 0.8720732260521568 0.3542190404086893  
0.3248794140548882 0.7764202279484584 0.3388789349689146  
0.3261967779322444 0.4840151329627347 0.3356760122667855  
0.1331983580448479 0.5798894858863491 0.3509245288847677  
0.0348371434987150 0.7744011917758957 0.3597402817054032

0.5533841493566223 0.4295865052191077 0.3326915204710078  
0.4678131894720587 0.6143208907834528 0.2938715218297991  
0.4919857562843236 0.4698903720067610 0.3016338695571443

Structure-TS5

1.0000000000000000  
14.7791996002000001 0.0000000000000000 0.0000000000000000  
7.3866954629999997 12.8008386819000002 0.0000000000000000  
0.0000000000000000 0.0000000000000000 18.0000000000000000

C N Fe H O

72 5 1 7 1

Direct

0.1551297891200449 0.0021743830740658 0.1681811813372448  
0.0434588251932425 0.0593910280063911 0.1687735356196964  
0.3209148183150340 0.0022593713980087 0.1682765746506281  
0.2099135539812267 0.0584485042068581 0.1686947420312280  
0.1541180578592916 0.1701264063097770 0.1693110268414942  
0.0433796538652267 0.2264682052365485 0.1698809977069324  
0.3193310908713350 0.1708371813529173 0.1680324826079991  
0.2084907944957918 0.2265064883557222 0.1687804521494954  
0.4862514565037470 0.0058625073260505 0.1684148929726379  
0.3753952309293087 0.0594492532340099 0.1682594512942155  
0.6515133472600294 0.0096840025186647 0.1689782664867634  
0.5406072827963723 0.0635217553727447 0.1682676235165922  
0.4840960353035592 0.1751743063262839 0.1672116353293576  
0.3733156215381356 0.2277583405232766 0.1670100698050587  
0.6483195215244968 0.1814783874391024 0.1689552467045807  
0.5356203181876081 0.2358600951385217 0.1672189854441290  
0.8170438469689688 0.0096676801342722 0.1691010139007269  
0.7050433658923281 0.0681031847027375 0.1691595806235862  
0.9862118501958164 0.0057777396259382 0.1682936924687806  
0.8741185899484828 0.0635165690116286 0.1688880473678425

0.8189738347921675 0.1751779663619786 0.1691842981645454  
0.7066881469146093 0.2358473911140304 0.1694767724573452  
0.9881889662559612 0.1707874905345785 0.1696631079423902  
0.8772840860874175 0.2276848799351825 0.1696064318284846  
0.1524527273970860 0.3378900678215113 0.1688021026183326  
0.0420898092078483 0.3942561304585050 0.1698404332820437  
0.3162558677154757 0.3388342286403295 0.1660438081454638  
0.2058666972254265 0.3946559714651051 0.1672226004257092  
0.1504763199890641 0.5055172189059152 0.1668291041475837  
0.0403363821760569 0.5621890180130763 0.1686875511634998  
0.3144328396615824 0.5063013224713483 0.1635733471965252  
0.2049375571965377 0.5613847226904642 0.1645768258008384  
0.3705491463628561 0.3940671863954553 0.1645062972299559  
0.6577942463598863 0.5061345631701013 0.1668454539222324  
0.8233437947126522 0.3387473515289097 0.1694119875374758  
0.7137940929572911 0.3939939518863636 0.1684657099313295  
0.9881301387829923 0.3378259348786240 0.1701917036751816  
0.8779491029077857 0.3945353079984183 0.1699828405701793  
0.8225562623999759 0.5054234130392923 0.1699367718946839  
0.7122110326486920 0.5612704182314704 0.1685036814764480  
0.9863795726164585 0.5057753806860714 0.1699258152210935  
0.8759956937621208 0.5621693992512450 0.1702912363337786  
0.1510501357944058 0.6723470334155032 0.1649169590042337  
0.0401924498678696 0.7292052394640398 0.1670124033477413  
0.3213725008789011 0.6641497127519216 0.1644325307834702  
0.2091989196635024 0.7248659737812596 0.1642345818358785  
0.1541245079860368 0.8364323862600017 0.1655850781388974  
0.0421492020414255 0.8941146404915542 0.1669635676832229  
0.3231711179147529 0.8318532869755076 0.1668523802923613  
0.2111822089049100 0.8902468375731722 0.1666991794588227  
0.4926202134716148 0.6642747408172482 0.1661584269891470  
0.3798326487957864 0.7185224967439966 0.1661136398840906



0.6550486654926497 0.6723328154307283 0.1684697729728629  
0.5442011984370231 0.7249371921233677 0.1674804216479629  
0.4876561860865666 0.8365487466762397 0.1680501614404336  
0.3767220125962948 0.8903017692484806 0.1677502626143402  
0.6528824931015723 0.8406103325755188 0.1692846368623812  
0.5420264665652993 0.8942098681534815 0.1687081336415825  
0.8198990211537364 0.6735283971198551 0.1700483183023952  
0.7090279595541099 0.7292206867031115 0.1694932651286243  
0.9850427689124422 0.6735603333520416 0.1685900299017127  
0.8742958223774691 0.7298688126434466 0.1696438827044719  
0.8184133515230517 0.8415269295217451 0.1694788708680445  
0.7073793133427491 0.8977426260601001 0.1694341600475095  
0.9849025550428535 0.8405299053878901 0.1676068018967407  
0.8732370762260140 0.8977063488790896 0.1689069052625124  
0.1565629045697026 0.8021534552178865 0.3431071826203173  
0.2649037402927860 0.7551812399901786 0.3406245692322550  
0.3288187198081810 0.6450742137527655 0.3495969182695211  
0.2789248859411915 0.5841862096752791 0.3543645996086452  
0.1709692558223062 0.6316712415010431 0.3523205916557814  
0.1088164996096511 0.7409922538386241 0.3483480656685007  
0.4771953848626805 0.3432610863341166 0.1652331762340453  
0.6575921221655889 0.3433636319839704 0.1697012506352104  
0.3702631219767226 0.5570356233549765 0.1636400154569538  
0.5512378229594033 0.5569999786940171 0.1647526486151652  
0.4342836877133233 0.5975031426342968 0.3591194609871373  
0.5137561975896071 0.4503889818094937 0.1768937013776941  
0.1085491849439752 0.8870937671612286 0.3394498255464858  
0.3022493638862714 0.8026848693172284 0.3350132438115158  
0.3292051862678219 0.4995358552658290 0.3566552462494412  
0.1339431108879620 0.5836122096187896 0.3538408509557065  
0.0238024974221494 0.7779007486507143 0.3484660608677457  
0.5683651661062056 0.4374112557678658 0.3102128716779055

0.4615314827198951 0.6429536623629301 0.3350673287988200  
0.5014036089813221 0.4636557083449438 0.2848106971976044

Structure-VI

1.0000000000000000

14.7791996002000001 0.0000000000000000 0.0000000000000000  
7.3866954629999997 12.8008386819000002 0.0000000000000000  
0.0000000000000000 0.0000000000000000 18.0000000000000000

C N Fe H

72 5 1 7

Direct

0.1557938492107241 0.0127863897257760 0.1709911979708927  
0.0442210330778468 0.0698862704795570 0.1732541877530784  
0.3215809019454224 0.0128747109627349 0.1708222079091834  
0.2106996062521143 0.0690429073829407 0.1712891304841967  
0.1546826035927679 0.1808489544391542 0.1718575530228006  
0.0440761590176527 0.2372477738567289 0.1742610261030152  
0.3200254907551239 0.1813851429795697 0.1691718483198973  
0.2091768435708132 0.2371427559349114 0.1698942355302479  
0.4870558380468364 0.0165623360143912 0.1712854307653661  
0.3761171715740922 0.0701275027130600 0.1706300892239035  
0.6524167737579264 0.0200862287750733 0.1723690988260911  
0.5413199325935898 0.0741282968064811 0.1711846613364537  
0.4848353791758438 0.1857997381411322 0.1687464048399929  
0.3740858039904269 0.2383632848199565 0.1667850609109809  
0.6498550536982719 0.1916736956789350 0.1763807630191148  
0.5360125994360737 0.2468831370433920 0.1695763393793443  
0.8180361831542763 0.0199407701581326 0.1735127635040291  
0.7063622107404305 0.0778173695187133 0.1740228399664951  
0.9873548950866589 0.0160505844561409 0.1723809669533246  
0.8754040975614883 0.0734281556921800 0.1746967631632109  
0.8203080958478868 0.1847698241926747 0.1801491380609143

0.7094174949166479 0.2422707620315030 0.1840000974104148  
0.9884919008417076 0.1816786679528118 0.1764011440406232  
0.8783482042971753 0.2381814477782847 0.1809561376072587  
0.1531926406978773 0.3485392035925321 0.1689001822263055  
0.0429547732689331 0.4048978366447080 0.1712330020124064  
0.3169498378075695 0.3493357908613487 0.1632137596481764  
0.2066569557733174 0.4051914923511456 0.1651128596918148  
0.1513029464625259 0.5160429818048416 0.1639982711226208  
0.0412626495509813 0.5726804828740700 0.1678035925384378  
0.3150236783436877 0.5171113426189765 0.1578900234216142  
0.2056544675191621 0.5719408785737807 0.1601535464500840  
0.3714328474778386 0.4044257628489707 0.1597896577999202  
0.6583612061624377 0.5168822214805404 0.1825449783324075  
0.8240230676397141 0.3499958485566241 0.1822450243981706  
0.7157217607702936 0.4065112282765723 0.1878567275795597  
0.9889585638623521 0.3485295501913342 0.1741167846325002  
0.8788057983059354 0.4054333953260603 0.1770833122322265  
0.8231859817220500 0.5163334484312908 0.1766094991539388  
0.7130311913473876 0.5722295265505972 0.1782704465244391  
0.9871908277426227 0.5164889689639490 0.1709985201113364  
0.8769006223336405 0.5729728894157241 0.1735880285322171  
0.1519254559948775 0.6829475468514458 0.1626745296925338  
0.0411756525732267 0.7396925261422624 0.1664873531043426  
0.3220203498047297 0.6751078311395547 0.1628712581335814  
0.2099479920092177 0.7355206296168986 0.1630589277961013  
0.1549536810110395 0.8470272777812071 0.1668978886873436  
0.0431889268827777 0.9044981051144951 0.1691238113102037  
0.3240348687847308 0.8424694473311536 0.1688622969893217  
0.2119834652392268 0.9008787480194598 0.1686371530635883  
0.4931495601954294 0.6751203207720462 0.1735547192722936  
0.3805790718029659 0.7292143758559169 0.1682148393561172  
0.6558113561194425 0.6830604591517232 0.1752398667506463

0.5448630525609149 0.7357258061795022 0.1734446054539963  
0.4884453338314565 0.8471350913121497 0.1717184110072485  
0.3774717244867464 0.9008702569110093 0.1705850569212557  
0.6536211354400857 0.8512274206521236 0.1728557711036810  
0.5428556716835213 0.9048195070407016 0.1721564261666944  
0.8208030962646473 0.6841112198174696 0.1731251052198294  
0.7098613083763444 0.7398120926656467 0.1738827453105997  
0.9859446221339935 0.6841186405841722 0.1683065947478037  
0.8753448431084633 0.7403458420125620 0.1710696941028185  
0.8193709215365643 0.8520590835877797 0.1716225374567787  
0.7081996085793252 0.9083148209552665 0.1724320535906549  
0.9859162160922443 0.8508875554202890 0.1688880679690763  
0.8743330287045400 0.9078562095724411 0.1712481155643361  
0.3808530294434607 0.6192579097246239 0.3327860809231633  
0.4020312676732606 0.5151096624849407 0.3235598218781843  
0.3197835011408315 0.4948429594515497 0.3398176507763201  
0.2212235282476100 0.5743598150006662 0.3609590526099753  
0.2008112582573346 0.6772947097247417 0.3673959288188259  
0.2819530876636074 0.6983305578118181 0.3538868933892166  
0.4779811512584142 0.3535488703468704 0.1635460175251957  
0.6599205363893310 0.3522619106216388 0.1983247367114589  
0.3704580963660732 0.5681249962145468 0.1598267520192591  
0.5508640511582005 0.5682690023786794 0.1795737154507858  
0.4965345789918802 0.4378585735082292 0.2953227155703275  
0.5104084953645068 0.4640257693846209 0.1805650027815429  
0.4430743788867494 0.6368137035928345 0.3216134263554998  
0.3348555360387881 0.4148356288787581 0.3333903063512548  
0.1594128710655194 0.5558589508575322 0.3714456135503867  
0.1230808742688497 0.7399271376091581 0.3827726207173849  
0.2671840561145486 0.7782494752930308 0.3594361625815926  
0.6210352692787106 0.3737298586210381 0.2515350082798419  
0.4947820439935326 0.3691744643743954 0.2978628277280840

Structure-VII

1.0000000000000000

14.7791996002000001 0.0000000000000000 0.0000000000000000

7.3866954629999997 12.8008386819000002 0.0000000000000000

0.0000000000000000 0.0000000000000000 18.0000000000000000

C N Fe H

72 5 1 7

Direct

0.1664336427187024 0.0005515051777525 0.1739192599316380

0.0547814145964935 0.0577019492036707 0.1743407152217997

0.3320769715908943 0.0006029381251672 0.1733873100884794

0.2211576243894681 0.0567748697091215 0.1727799984106336

0.1653049393764912 0.1685071800359699 0.1710643148680425

0.0546567036807268 0.2248399379094752 0.1718864655814681

0.3305385205627983 0.1690720717797035 0.1699950553127297

0.2196332702908119 0.2248180805580606 0.1691593403476339

0.4974435702039129 0.0042702872238255 0.1736704002426533

0.3865996592853458 0.0577527919334807 0.1724154856402498

0.6628640169077497 0.0079670070158399 0.1747884739046271

0.5518198066440639 0.0618727627451641 0.1735531364152106

0.4952540611125587 0.1734418045820544 0.1714302254050091

0.3844708334238491 0.2259616383965892 0.1689080901343156

0.6597237820463168 0.1796320446031866 0.1755927639562393

0.5469221091612075 0.2340650411956321 0.1721541352826679

0.8283251258598738 0.0079121105409121 0.1756152391824983

0.7164678609484922 0.0662009856520098 0.1755887598123925

0.9974841758722837 0.0041684184517764 0.1749821143434185

0.8854708682135345 0.0618121335648959 0.1757378241517915

0.8304785779221019 0.1733795851549703 0.1762899455991262

0.7181551863873643 0.2339784540519468 0.1769478160734158

0.9995117639718349 0.1690862576044995 0.1739840580607422  
0.8887702648779008 0.2259357536990715 0.1754298047976916  
0.1636112108627846 0.3361377330601091 0.1677149324913797  
0.0533137611715223 0.3925623271356268 0.1690212308497516  
0.3273135896624432 0.3370397091025206 0.1660039304171788  
0.2169939132368262 0.3929374617466124 0.1661871674635920  
0.1616389006756405 0.5037664629493834 0.1665545677303692  
0.0514828438896904 0.5605279829221975 0.1684755643360170  
0.3254204788784990 0.5044212685238183 0.1656520453566274  
0.2160681224701838 0.5596412712709622 0.1664145672442962  
0.3813878149539398 0.3923559013001341 0.1657993805419067  
0.6695657688198913 0.5042921354845952 0.1774287533125069  
0.8348850404640302 0.3370785405135355 0.1755396827916429  
0.7255143439024556 0.3923650139869232 0.1774711526203046  
0.9994511612548693 0.3361350417033851 0.1712238850162907  
0.8893248691032584 0.3929445663973419 0.1734306750880928  
0.8339346943808229 0.5037728709694490 0.1735909983647602  
0.7236351447229386 0.5596138342049128 0.1756472665517621  
0.9975583218754622 0.5041498406095440 0.1693858057518526  
0.8872727728321228 0.5605860743133233 0.1717343368465475  
0.1621910033213444 0.6706624624931210 0.1692545512625366  
0.0514025117294845 0.7275320635185030 0.1708758722092669  
0.3327006536703009 0.6624908508023205 0.1712307735880663  
0.2204328019836137 0.7231320090986280 0.1710680998925703  
0.1654194787654660 0.8346983727824019 0.1734131263985669  
0.0534424764104601 0.8923627007436761 0.1740196613708039  
0.3343955622284961 0.8303099269529579 0.1748500494095157  
0.2225355430711683 0.8886233780458578 0.1742915765037051  
0.5038089834185314 0.6626399255197660 0.1765237737513941  
0.3910724755615561 0.7169037166540658 0.1747689706797254  
0.6663803330401515 0.6707612874239380 0.1755801404987084  
0.5555322935733362 0.7232537802907405 0.1760897855123101

0.4989377376747205 0.8348355622706780 0.1753217607470177  
0.3879006754195055 0.8886745059367770 0.1748816745969531  
0.6641526552611057 0.8389791112867142 0.1746806202854179  
0.5533103940088071 0.8924885790612030 0.1748004247904701  
0.8311991591114763 0.6718742140575754 0.1727231754441167  
0.7202934202692283 0.7276076288335573 0.1744626064407336  
0.9962255091843192 0.6718183552624978 0.1703256552556490  
0.8855681555694318 0.7281597253162153 0.1722005675716163  
0.8296686962538317 0.8398787372784495 0.1737918923640521  
0.7186994502116254 0.8960727782945953 0.1745493046031249  
0.9961319329776299 0.8388340932848581 0.1732065954603805  
0.8844592834791747 0.8960037100433113 0.1743166902035539  
0.3486475100244347 0.5930898359173267 0.3516749342210975  
0.4092329292659909 0.4864125347810555 0.3352724000220849  
0.3633376588838489 0.4232147324179665 0.3374923430575809  
0.2582551886906495 0.4664444686939425 0.3566284347015750  
0.1980041617356735 0.5726089083673847 0.3739032961361202  
0.2437903689125750 0.6355975240758218 0.3712123046266974  
0.4883204524650855 0.3413534419486386 0.1695898278584171  
0.6693690667618947 0.3413136476892467 0.1784502103047626  
0.3813863092087041 0.5553638062661815 0.1684878336185525  
0.5623887176495653 0.5553016906209278 0.1782546223885519  
0.5133556006274582 0.4448136924975825 0.3101914746198918  
0.5247357245781563 0.4484730885085469 0.1798896043983953  
0.3837485746084426 0.6428487598687082 0.3480439954902221  
0.4097685716768978 0.3406999376087740 0.3225510446193571  
0.2231495422194524 0.4166344255304548 0.3575887443405501  
0.1160493083834785 0.6060696061006944 0.3893792187040437  
0.1975809144476661 0.7187015376897237 0.3844045542515134  
0.5482126414227295 0.4854730627369720 0.3283003800827564  
0.5598884080403305 0.3669135053184826 0.3206208951781954

**For Fe nanoparticles catalyst**

Structure- I

1.000000000000000

14.7791996002000001 0.0000000000000000 0.0000000000000000

7.3866954629999997 12.8008386819000002 0.0000000000000000

0.0000000000000000 0.0000000000000000 23.0000000000000000

C N Fe H O

74 5 6 6 2

Direct

0.1740773214083942 0.9867920590613986 0.1349749306202861

0.0629554239902649 0.0425690881194949 0.1354605008182804

0.3403458453953371 0.9873197161146104 0.1337262359575277

0.2295117400620099 0.0428281329341495 0.1347831780898845

0.1738134232133085 0.1542990604199458 0.1352284164582882

0.0630043001442988 0.2092825750446083 0.1359467418330078

0.3405870110973367 0.1536053538027428 0.1335648379984305

0.2295851472459285 0.2101765399726441 0.1345515723817663

0.5072876668506298 0.9872045058650486 0.1320575363312130

0.3958029920685351 0.0431027905828169 0.1330785094500739

0.6736505724047831 0.9872099517877005 0.1316284662218520

0.5624578202111926 0.0432316953031254 0.1320108559583140

0.5064045810549607 0.1553116024738880 0.1325147385414183

0.3951990229129396 0.2102888118187067 0.1331450487996484

0.6741605400494005 0.1531991450066110 0.1327101497895554

0.5623810161076696 0.2105028196754139 0.1323521687202102

0.8410108642729189 0.9865561736252599 0.1332196503299836

0.7295033881724120 0.0427814459705408 0.1324440558660993

0.8958010727604359 0.0427120908551016 0.1345659779378477

0.8402559149078315 0.1539243725246136 0.1354810561431518

0.0073519549276689 0.1536451672992458 0.1362382718147698



0.8959576597134050 0.2094817962469532 0.1366930683975981  
0.0641595668609985 0.3756395590985183 0.1345737298674167  
0.3404533109506672 0.3208569284357113 0.1337373847625477  
0.1748840186609475 0.4868974197036777 0.1333680685750085  
0.0638286457308779 0.5412567460450438 0.1331236038807193  
0.3404598481609742 0.4884643461843303 0.1350211439475420  
0.2297397870633917 0.5420723967118926 0.1337990199900008  
0.5068464034637022 0.3211115920374895 0.1324838435030201  
0.6720832045219989 0.3201070959687076 0.1354951678211013  
0.6720072973168374 0.4891829726425005 0.1318880775542354  
0.8407071987966941 0.3205162598268426 0.1370801226116845  
0.7266225595890615 0.3775840014152003 0.1376430036546820  
0.0081676839870112 0.3201194115126180 0.1354998059209789  
0.0075337644701547 0.4872399773200158 0.1335724913186237  
0.0639636734210390 0.7085804737855220 0.1332278359479708  
0.3392588370275105 0.6528666774283801 0.1344243213991075  
0.1738146683948473 0.8194430580869667 0.1338445917066841  
0.0630109848184235 0.8758937081264151 0.1339688318441313  
0.3407860291929960 0.8202375857114038 0.1334374470066247  
0.2297249821243317 0.8752527645110636 0.1343205860986257  
0.5078174799212147 0.6517652185484477 0.1292850813655727  
0.5072273805041951 0.8197750839876150 0.1313299270738732  
0.3960457948385734 0.8760902341147279 0.1330130246954166  
0.6739070712101031 0.8206860272818155 0.1304672005360649  
0.5628435725241976 0.8758361972954857 0.1312316634550303  
0.7296624264914625 0.7091209883795955 0.1300397539424141  
0.7293533495699813 0.8760975025603569 0.1310121408398761  
0.0083317071304504 0.8193002653013132 0.1333037351016530  
0.8966915143921025 0.8751737515671505 0.1326697310412950  
0.7285363785799174 0.2096865532957940 0.1345630935973342  
0.1744608398333747 0.3208516275889180 0.1344365784047782  
0.3957735434507898 0.3760518155529263 0.1341407429011162

0.2295235600939320 0.7080470880511622 0.1340000703432219  
0.3963075485314582 0.7078484743635319 0.1325677538624855  
0.6743187402678598 0.6541056415152445 0.1291047297312000  
0.5628734546760037 0.7082317914093791 0.1295302958155277  
0.8963779249197688 0.3758685515806227 0.1355312003227097  
0.7287605277017863 0.5428863815308844 0.1311070289732973  
0.8962285193731062 0.5425932271664633 0.1327078073268828  
0.8403936904512596 0.4870640357396910 0.1332644651475215  
0.8412917889062222 0.6535908498938756 0.1313385768288265  
0.0091079185952837 0.6528784659682435 0.1326757753016582  
0.8411567345219906 0.8200305636532798 0.1315667136423352  
0.8971138690522041 0.7090386212612457 0.1317803249750980  
0.3965852517456765 0.5413100957622284 0.1373200434069800  
0.5096699193508062 0.4862896949597443 0.1463179858446624  
0.0074413070591509 0.9867342386957073 0.1347707434510672  
0.3893348173260752 0.7779755269312885 0.3959308123272149  
0.4889884141160677 0.7009102228415736 0.4134829911507598  
0.5099668274367680 0.5965651425588557 0.4237258048657855  
0.4274774796763959 0.5724978485860105 0.4161600085793214  
0.3265612288482787 0.6531603618229386 0.4006852869509957  
0.3073684265373061 0.7554758875438152 0.3887720823426109  
0.1737294849741448 0.6533972337004978 0.1339941755306073  
0.2301603573405944 0.3760386538574749 0.1338241913955857  
0.5630613506878692 0.5416602260781043 0.1241888690952294  
0.5626131759433514 0.3754249411032773 0.1307596291394414  
0.6119281623948150 0.5185849621523970 0.4320686589113518  
0.6087113818057066 0.5734338562045175 0.2779271313433152  
0.4331703974944708 0.7063317373617248 0.2297031007626650  
0.7067159332753931 0.3980013802639148 0.2305472656557752  
0.6195475054722523 0.4181324333395636 0.3333743813514321  
0.4975420827955227 0.5019444427386904 0.2378570113664707  
0.4375216647352119 0.6249584618049888 0.3295984397613073

0.3752822798679179 0.8561743915790062 0.3862102072402021  
0.5530418874104673 0.7167107239795424 0.4185883511534323  
0.4430499870443302 0.4939012392637784 0.4254821177435956  
0.2634619528926939 0.6354677623361605 0.3971794879534283  
0.2300204212196132 0.8162107485832452 0.3749845623239783  
0.7312302598739424 0.4558149732573042 0.2905358219489449  
0.6346522630952315 0.4193917255360278 0.4176458555083617  
0.6848632435185689 0.5370031324929564 0.4429624338003799

Structure-TS1

1.0000000000000000

14.7791996002000001 0.0000000000000000 0.0000000000000000  
7.3866954629999997 12.8008386819000002 0.0000000000000000  
0.0000000000000000 0.0000000000000000 23.0000000000000000

C N Fe H O

74 5 6 6 2

Direct

0.1748930382426423 0.9866012664786313 0.1352831318998655  
0.0637325152154835 0.0424329529307485 0.1352396749905915  
0.3412044286022734 0.9870960078169690 0.1344565494981884  
0.2303135149599507 0.0426728047780356 0.1352715887281354  
0.1746604483342521 0.1541593169078934 0.1352401027271616  
0.0638066258969978 0.2091359614985005 0.1354332923963432  
0.3414852976082698 0.1534924888626511 0.1337590537913721  
0.2304423959820438 0.2100582196918191 0.1344908151867795  
0.5080838715756115 0.9871036951506962 0.1323624387073317  
0.3966553630524399 0.0429574530345077 0.1336113677585092  
0.6743873751487691 0.9871043093397618 0.1313408398396509  
0.5632135219217927 0.0431049538398343 0.1318495810424609  
0.5072329366250099 0.1551109116582269 0.1320513888838018  
0.3960764874472658 0.2101171324809716 0.1329172786412173  
0.6748649294215573 0.1531601928574815 0.1317953983116980

0.5632331012251321 0.2102963273520605 0.1316123741019304  
0.8417816396542941 0.9865070525744559 0.1325050949682518  
0.7302486579558969 0.0426355891491620 0.1317209372453839  
0.8965870289446224 0.0426624624815170 0.1338449130451451  
0.8409995425857715 0.1538816419512802 0.1345439616923689  
0.0081026600612847 0.1535611010070854 0.1356535584664726  
0.8966990953493342 0.2093988633807700 0.1357807559025414  
0.0648792778121865 0.3755636054619385 0.1336216075939372  
0.3414356758910995 0.3207786904178659 0.1333724598975029  
0.1755425330289865 0.4869232306323965 0.1327077570776224  
0.0646781409931288 0.5411881896030051 0.1322413443766873  
0.3412723375516187 0.4885408857490194 0.1346852149604093  
0.2305573613466318 0.5421650057678133 0.1332751981223379  
0.5077882134805758 0.3210291180245121 0.132212779773473  
0.6727945244681528 0.3200578834509407 0.1344820502014733  
0.6728370798638211 0.4889015632485757 0.1321671691506660  
0.8412524992942148 0.3203992371388480 0.1359910495860459  
0.7275441505444551 0.3772938447760100 0.1373056898134550  
0.0089356463215046 0.3199746262777811 0.1346001336915647  
0.0082365711428660 0.4870804028416343 0.1325236922524818  
0.0646771582796568 0.7084732165389103 0.1327029067789926  
0.3403092168449054 0.6525589820657410 0.1350529454581632  
0.1746404754671230 0.8192418214161991 0.1340058103205305  
0.0638206401384406 0.8757403025321442 0.1337327802462439  
0.3416911413729806 0.8198709618118116 0.1344354423675208  
0.2305876211980588 0.8749843911186309 0.1348746661981369  
0.5086906577095257 0.6516624609643736 0.1315129734660319  
0.5080059426727892 0.8197373347780318 0.1319755640363117  
0.3968512811673344 0.8758497287578041 0.1338378102394681  
0.6746734811416716 0.8205036470543688 0.1305426119002682  
0.5636075307181462 0.8757379161267672 0.1315422061273101  
0.7304645835551500 0.7090015991936963 0.1298661080981561

0.7300954751458772 0.8759774547051066 0.1309271911281991  
0.0091257531799444 0.8191988337304155 0.1328491965892080  
0.8974791956032835 0.8750674550961022 0.1321370103055074  
0.7292843769031644 0.2096741984598874 0.1334273463204626  
0.1753733310933028 0.3207844651420994 0.1338653618215515  
0.3966389938086748 0.3760185584535360 0.1338248748768702  
0.230399999379997 0.7077620332122099 0.1339663499657870  
0.3971131003424130 0.7077354779508626 0.1343230676008458  
0.6750443516808161 0.6539315688229884 0.1292875669593716  
0.5637959211543784 0.7081932635578161 0.1304731128754194  
0.8971229917195020 0.3756525953490386 0.1345887464048749  
0.7295288673337275 0.5427069915307083 0.1309799361780813  
0.8970623713483222 0.5423724114645361 0.1318341540380995  
0.8411697985858458 0.4867817892755289 0.1325632092385111  
0.8420112844649179 0.6534744044372416 0.1307116720457809  
0.0098331082310115 0.6527803371466324 0.1319373432860778  
0.8418581921677927 0.8199386911221956 0.1311888386846141  
0.8978548311794970 0.7088621239526101 0.1311594792236385  
0.3976389041779388 0.5411563380915230 0.1376427165785026  
0.5101694964610956 0.4860203676177653 0.1479967472261034  
0.0082103085307093 0.9866491432955786 0.1343809887648149  
0.3882655346676093 0.7779039763629695 0.3974103017166187  
0.4893539834877122 0.6997350327977958 0.4128586971370818  
0.5092413855789889 0.5974113513488469 0.4266693905287546  
0.4255629546770875 0.5750292026630006 0.4231862266818744  
0.3241319773413009 0.6556865851174498 0.4082844577401957  
0.3049844388876858 0.7572684152712639 0.3950302236161567  
0.1745244682158156 0.6531887109186705 0.1335202898779623  
0.2309869504656342 0.3760071990619711 0.1333572472031956  
0.5640479672679825 0.5418095486268780 0.1267996144563833  
0.5636272928475894 0.3751070546218059 0.1314464318154510  
0.6107553510293583 0.5179507153584665 0.4356379234701326

0.6153885623360988 0.5740967375628133 0.2906919813675417  
0.4482210108749964 0.6993970656805275 0.2335714232060953  
0.7100624209337288 0.4004855167573324 0.2345724095097275  
0.6262663865417669 0.4145464125442206 0.3382199909602647  
0.5098081644019318 0.4964621001864675 0.2419685952842424  
0.4307260074104987 0.6197757992901396 0.3317715210379547  
0.3748679889383348 0.8551475888932524 0.3856617585000281  
0.5545667611825136 0.7143084326134467 0.4139241606710774  
0.4415018360731167 0.4965148825668884 0.4332103326868673  
0.2606110326592477 0.6382962542087877 0.4063818653926841  
0.2271239784202120 0.8181727589784400 0.3821129403629344  
0.6864820689557375 0.5233767913883473 0.3542768232234126  
0.6287895306553196 0.4193148925947376 0.4224975549493352  
0.6868800310928282 0.5357527307377506 0.4235926924564296

#### Structure- II

1.0000000000000000

14.7791996002000001 0.0000000000000000 0.0000000000000000

7.3866954629999997 12.8008386819000002 0.0000000000000000

0.0000000000000000 0.0000000000000000 23.0000000000000000

C N Fe H O

74 5 6 6 2

#### Direct

0.1736064282093317 0.9890444257161062 0.1429156562719347

0.0624656403215934 0.0447743814750912 0.1418715759992726

0.3398268584869891 0.9897218072780508 0.1426336224431727

0.2290189473258152 0.0451517216583141 0.1429698951621722

0.1732812736675100 0.1566526580338925 0.1424505034825427

0.0625162158331835 0.2115917193476649 0.1410739268428136

0.3401574145535726 0.1559449053861522 0.1428144925227486

0.2291306481417247 0.2125055644272115 0.1427676040267579

0.5067915911167391 0.9895513038370912 0.1411031711294797  
0.3952974280709501 0.0455131604438811 0.1423370490334467  
0.6731312892835479 0.9894962702812340 0.1397053308642449  
0.5619054657844458 0.0455359693768407 0.1405410275060228  
0.5059162133124538 0.1575541716538209 0.1408188793731363  
0.3947446671699454 0.2126237848520535 0.1422822561681419  
0.6735883377425365 0.1554497143687763 0.1384760909118720  
0.5618888834110612 0.2126847976041661 0.1395510112315712  
0.8405649889636837 0.9887782134618458 0.1397428547081518  
0.7290465804259890 0.0448858079234873 0.1391026336994127  
0.8953863186630645 0.0449300355183935 0.1398259845410847  
0.8397163529109051 0.1561451664798760 0.1384939833375397  
0.0067866655395757 0.1559156511293582 0.1407542091937270  
0.8955613286681384 0.2114698313001976 0.1389248504698730  
0.0638322228440165 0.3778609077608156 0.1401717932346362  
0.3401216583106723 0.3231653697138812 0.1430477177491312  
0.1746342338128892 0.4893009677825407 0.1416284043771908  
0.0634308667578605 0.5435933311089709 0.1404052113569023  
0.3406218595181922 0.4907649387207915 0.1437864088160309  
0.2293446513501549 0.5444089650320821 0.1422953510031390  
0.5064818126083512 0.3233806979134748 0.1406507552884144  
0.6713280548116923 0.3224358647242500 0.1369951042962460  
0.6719140643515619 0.4905178617306450 0.1346755806339975  
0.8399488551657588 0.3226938075178488 0.1372051947092250  
0.7263565225114195 0.3790110520643513 0.1358080850282126  
0.0078346149593137 0.3223482354819504 0.1396276538875875  
0.0071838573538712 0.4895567274897796 0.1392452137019979  
0.0635977572665040 0.7108416034267526 0.1414148775592911  
0.3393027070699608 0.6544864899726127 0.1438493314195056  
0.1735169181823969 0.8214749785748384 0.1427296497386800  
0.0627232338794310 0.8779774215561373 0.1418991149125984  
0.3402674889099585 0.8226057482290734 0.1424824631247947

0.2293347765428173 0.8774379673571374 0.1432015996394840  
0.5075459311580433 0.6536879092059422 0.1382703968758254  
0.5066696964958980 0.8223093665852689 0.1393690451461061  
0.3954469446075844 0.8785046998043510 0.1416215713053438  
0.6733943949296203 0.8229737261762682 0.1387912732528221  
0.5622844068482731 0.8782765274837674 0.1397306848953609  
0.7291883431144744 0.7114436408920884 0.1371015893593966  
0.7288447722238302 0.8783667161876269 0.1395166477062016  
0.0080052805190931 0.8214908090506168 0.1413146115076515  
0.8963101687427052 0.8773834907971310 0.1404418562655071  
0.7278486070085324 0.2119969211643455 0.1376625096174095  
0.1740806832721842 0.3231951171911757 0.1419795418213848  
0.3954454776812850 0.3783411201927328 0.1434037839234884  
0.2293527845941257 0.7099730825391134 0.1429826637076479  
0.3958548132696268 0.7102064357380011 0.1427715654039227  
0.6738746764437374 0.6563835250071464 0.1353812578287339  
0.5623828852272403 0.7106844216332191 0.1370759711567337  
0.8960731775749657 0.3781022026039544 0.1373988777634717  
0.7284141953098422 0.5449828951062764 0.1347324705966070  
0.8959375454916289 0.5448530952627029 0.1374031021863175  
0.8401806000067559 0.4893675486513875 0.1357128655208781  
0.8408715442697864 0.6559282783456101 0.1378697585780262  
0.0087410977805850 0.6551321161040375 0.1403488443051859  
0.8406492683295346 0.8223440078239574 0.1398148452177785  
0.8966811360639577 0.7112916528836581 0.1394275938349916  
0.3965944403921855 0.5432104080844296 0.1463276717517208  
0.5102157350280446 0.4879665021927486 0.1567957853625653  
0.0069823678586808 0.9889256499537508 0.1412560981899723  
0.4298864491924760 0.7483693425482694 0.4141110099449926  
0.5289429903011763 0.6659895735679925 0.4319517279040189  
0.5485072476473623 0.5620739272467381 0.4311508687808212  
0.4686136324269194 0.5412948439192821 0.4117091584058122



0.3700634783381092 0.6246232200764118 0.3956380818345697  
0.3495719581378408 0.7290773011589249 0.3973384660501112  
0.1734394948431970 0.6555504225892842 0.1424592712793441  
0.2298303656304433 0.3783844485670080 0.1425792464684112  
0.5619033810928871 0.5435894708431075 0.1310600225808648  
0.5618137400632178 0.3777718799692875 0.1386070940971513  
0.6451542308409726 0.4757907737837155 0.4473401127109403  
0.6542002090614116 0.5895428198301300 0.2739710776498673  
0.4637365297063432 0.6959305719893241 0.2335014202152876  
0.7433592462851883 0.4041347348430889 0.2297045683148501  
0.6835446478714207 0.4296976917380336 0.3324278843148831  
0.5443705818076172 0.4947605106853490 0.2516221968477575  
0.4939667015753121 0.6309517949525490 0.3361010725305918  
0.4172493591601478 0.8275536723792761 0.4119090291882858  
0.5911893460776193 0.6813904419625899 0.4436783557409186  
0.4858408711764104 0.4606777710243551 0.4103045041448659  
0.3101439889127427 0.6076991312439382 0.3805451147045325  
0.2744059195802558 0.7928593898511643 0.3829998126083464  
0.7804937195014190 0.4533499268470173 0.4669511698486558  
0.6750728935850906 0.3897359453637566 0.4120851559343265  
0.7239326691326213 0.5086137596466584 0.4442846044225700

Structure-III

1.0000000000000000

14.7791996002000001 0.0000000000000000 0.0000000000000000  
7.3866954629999997 12.8008386819000002 0.0000000000000000  
0.0000000000000000 0.0000000000000000 23.0000000000000000

C N Fe H O

74 5 6 6 1

Direct

0.1728037533128084 0.9896227719881612 0.1441273999137689

0.0615857617691067 0.0455181601390024 0.1438308856685791  
0.3390559274650309 0.9902266773649202 0.1421909187729442  
0.2282171991742695 0.0456821920839312 0.1437304946465160  
0.1724844763083150 0.1572003236781097 0.1436680171490038  
0.0616573567135947 0.2121771611233541 0.1435449921817224  
0.3392984333121658 0.1565633253232349 0.1417301821457992  
0.2283000010734841 0.2131105948796480 0.1428248733683949  
0.5058917268389413 0.9901463219274460 0.1391637407380434  
0.3944751165432339 0.0460321913483215 0.1410029482157262  
0.6722361657190705 0.9901617330856470 0.1384207545228544  
0.5610711468005355 0.0461151590474146 0.1390864644679683  
0.5050619721820672 0.1580997194689142 0.1398479830294491  
0.3939222190525991 0.2131362078663039 0.1411369318554944  
0.6726497490723505 0.1561946038420679 0.1390956699881250  
0.5610988824747537 0.2132389185542744 0.1394109080290469  
0.8396533483412406 0.9895990033040719 0.1399719311377493  
0.7280851671456917 0.0456969820481035 0.1390956792303126  
0.8944586220374224 0.0456924221806433 0.1413746899086967  
0.8388765107188578 0.1569818810469458 0.1411424762433125  
0.0059330575340360 0.1565698863157479 0.1436267921890457  
0.8945014045842756 0.2123129534640100 0.1426735627369795  
0.0628590174074984 0.3785923612831095 0.1413097843215763  
0.3392796485795228 0.3238021106758919 0.1420884591714972  
0.1736681009148821 0.4899878940281489 0.1412175306100877  
0.0625886303385731 0.5442658360325372 0.1400567503276729  
0.3396266062138182 0.4914829423140541 0.1431520821633986  
0.2284678522940731 0.5451241148588325 0.1418044171921024  
0.5056979352100287 0.3240124673738314 0.1405803005822727  
0.6705906660635074 0.3230635491474819 0.1392882444458376  
0.6705817275449522 0.4916135119584809 0.1354508753572266  
0.8386747724707424 0.3235527423194348 0.1415895969195262  
0.7251091654568316 0.3800774647491270 0.1399215353643371

0.0069647434838961 0.3230224030035719 0.1420223838509513  
0.0062229197707485 0.4902582843163232 0.1395937518256608  
0.0626806750034115 0.7115082559169648 0.1407819282338873  
0.3383275191148036 0.6549887137334393 0.1432534237962743  
0.1726120499376312 0.8221823401906121 0.1430545616976078  
0.0617553198728206 0.8787898383740900 0.1424113645217420  
0.3395619094846547 0.8230944024825618 0.1427633951500997  
0.2285629038964309 0.8780067862364485 0.1438671358189468  
0.5067129478050205 0.6545436719360432 0.1362972422166918  
0.5059024565577916 0.8227586490779845 0.1376468189868117  
0.3947324037486695 0.8789342300803233 0.1411873661283944  
0.6725493346712577 0.8236201520912720 0.1361707023312502  
0.5614392861153666 0.8788373120907076 0.1374063635473484  
0.7283067857870686 0.7121123566578833 0.1346976613370250  
0.7279805606471613 0.8790367881445921 0.1374833585409239  
0.0070735040991185 0.8222612342972284 0.1409981815887745  
0.8953802877550228 0.8781641615725445 0.1397922704071989  
0.7270433976928105 0.2128649001404105 0.1395475525479746  
0.1732405935036885 0.3238348384608133 0.1421540216360023  
0.3946169732629793 0.3789069193950435 0.1426994200007571  
0.2283650089897327 0.7107249033467047 0.1427352208632552  
0.3954186925471349 0.7103789087029413 0.1423946615531774  
0.6727940975174559 0.6572209844177321 0.1329676652640396  
0.5615318905253498 0.7113298049185423 0.1346862546063523  
0.8950301711692731 0.3788366081133012 0.1405343743515138  
0.7273332069263830 0.5458847483445629 0.1345943972733079  
0.8950803571671022 0.5456382994028706 0.1374975342052694  
0.8391832806123799 0.4900860955767433 0.1371365056024745  
0.8399557942201799 0.6566027251162704 0.1363723409316992  
0.0077913021672061 0.6557982686824800 0.1395025264360358  
0.8397711960056836 0.8230239727941104 0.1382083797592020  
0.8957796312466968 0.7119962795868998 0.1379947192763256

0.3954888355531181 0.5439837516587550 0.1455626300184038  
0.5090332807802005 0.4895147270362404 0.1567568342689842  
0.0060691233461468 0.9896810572882058 0.1427403147396726  
0.4378059684795751 0.7440451604314781 0.4158184591085027  
0.5390241478391112 0.6580262840577942 0.4213418913824384  
0.5562656020873249 0.5536047401339251 0.4238602882965620  
0.4668898957950132 0.5401310279944697 0.4179548306984724  
0.3657582045337494 0.6277510643643023 0.4125097125794881  
0.3500963892579830 0.7301599955975361 0.4117381691746309  
0.1725324413805043 0.6561719440267579 0.1419926097958038  
0.2290145279169449 0.3789543091517616 0.1418651297864613  
0.5611181730515524 0.5446160318531329 0.1293636259359407  
0.5613702735146301 0.3780489880704063 0.1398313786933621  
0.6583895229346756 0.4726964104943974 0.4226557586184168  
0.6280366890914232 0.6079587591480567 0.2864358058235924  
0.4431472437193440 0.7019224179739839 0.2365865927416138  
0.7421516842525648 0.4338916523582709 0.2326188972847270  
0.6740098100016324 0.4305295395461557 0.3368401804038436  
0.5481058341470909 0.4965606051131418 0.2471172272335856  
0.4667478798532313 0.6277194619268265 0.3360216839864993  
0.4270799511980121 0.8224778119612343 0.4131251197737140  
0.6069553121791942 0.6684409407590171 0.4235802113059231  
0.4800504284425351 0.4608054038586850 0.4172101189391910  
0.2989537441419360 0.6157162993486544 0.4080578767193974  
0.2720746664618169 0.7971348486973493 0.4056910712460043  
0.6713351423480233 0.3725391607713747 0.2711188762332645  
0.6636576164672747 0.3768798331788279 0.4100954014183325

Structure-TS3

1.000000000000000

14.7791996002000001 0.000000000000000 0.000000000000000

7.3866954629999997 12.8008386819000002 0.000000000000000

0.0000000000000000 0.0000000000000000 23.0000000000000000

C N Fe H O

74 5 6 6 1

Direct

0.1743489395909781 0.9877606468669176 0.1435549636791417  
0.0631651848447114 0.0436574702618961 0.1438527311997271  
0.3405346997047836 0.9884391895488689 0.1420501031457846  
0.2296986748540394 0.0438605350245971 0.1433767156879454  
0.1740212970172190 0.1553434753157588 0.1439161007079416  
0.0632379553339477 0.2102898284772047 0.1441186148818704  
0.3408701616928452 0.1547585393315115 0.1429844519103836  
0.2298367659869912 0.2113080950332830 0.1437423445081786  
0.5074753943495215 0.9882927500580423 0.1406506380563151  
0.3960172840237100 0.0442444808634304 0.1418181118887040  
0.6738023695852837 0.9883731441013938 0.1406755209694922  
0.5626427280860122 0.0443977584409391 0.1411706677424701  
0.5066256885399838 0.1563598904280813 0.1425335273857299  
0.3954645006430190 0.2114337587180189 0.1434276969058886  
0.6741416033407029 0.1543401873060737 0.1424063205455940  
0.5626782650710529 0.2115398442664553 0.1430898387582956  
0.8412914425945103 0.9876770098526805 0.1416520675077815  
0.7295994387099071 0.0439374242854004 0.1414975143500403  
0.8960531576497583 0.0438280272317129 0.1426557557337192  
0.8404537411560394 0.1551369204324176 0.1431034899612939  
0.0075217323178685 0.1546653175114886 0.1442202228851262  
0.8961190794804641 0.2102561520975473 0.1440683342854521  
0.0644628904781624 0.3767679287427213 0.1429205636538486  
0.3409109007594214 0.3220284887472522 0.1451018471600448  
0.1753813937644367 0.4881270027958833 0.1434636002228155  
0.0643109044429388 0.5424463812597597 0.1419971011906769  
0.3413794622542413 0.4897536227767557 0.1475247912472066  
0.2302408232208781 0.5433091524815263 0.1446317885533950

0.5072346019915327 0.3223656174017210 0.1453217199630724  
0.6719792731426514 0.3211417015336578 0.1433707359027727  
0.6720592638637879 0.4895833870523985 0.1368845522675708  
0.8402479434134404 0.3215872466843258 0.1432345698145932  
0.7266156803071955 0.3782438394959302 0.1426275650348856  
0.0085932983325331 0.3211357801747038 0.1432374265351006  
0.0078709684287585 0.4884058688222533 0.1415873500496937  
0.0643764393373730 0.7096478533209044 0.1423990292717243  
0.3401085674509139 0.6531570986786921 0.1444701190790539  
0.1742592285007243 0.8202374442457899 0.1427515797974608  
0.0633391041203066 0.8768999060731306 0.1426838315987608  
0.3409639748471286 0.8209642392951216 0.1415255745116044  
0.2299498187877402 0.8761712563175341 0.1429696509340189  
0.5080308193551020 0.6523858596828800 0.1370687260441838  
0.5074566970984058 0.8209862921684948 0.1384820834942092  
0.3961251835899502 0.8772331326061868 0.1406629057303568  
0.6742062710565366 0.8217951071615248 0.1384419286039767  
0.5630710320119309 0.8770655695691653 0.1390767898182981  
0.7299448484796579 0.7102272418333930 0.1372726117478731  
0.7296147006155551 0.8771682485809043 0.1396130859140716  
0.0087033931997752 0.8203850528878084 0.1420442633372132  
0.8969827324696557 0.8763718182312441 0.1412015391898018  
0.7284111350337521 0.2112532973735129 0.1428256882613390  
0.1748255412744899 0.3219789232132687 0.1437616857100841  
0.3961817825342434 0.3771749619509270 0.1470870652326852  
0.2301216039832505 0.7088071855645219 0.1434372995866456  
0.3964889808529215 0.7085287334347038 0.1410276934599813  
0.6745584712505768 0.6553009168628187 0.1356154707163857  
0.5630423403770671 0.7091867254541271 0.1364963857924500  
0.8967612221433646 0.3768335331050014 0.1419226933083881  
0.7287169000096205 0.5439808966754484 0.1363737672066010  
0.8967780874094050 0.5438631905547822 0.1397826388536887

0.8407888432576004 0.4882235322454119 0.1393603023568779  
0.8416171638767261 0.6547725368398943 0.1386931208258773  
0.0095080617865166 0.6539331221530001 0.1413925942156027  
0.8414331673273001 0.8211442531246633 0.1400758507578911  
0.8974437813874977 0.7102045569282847 0.1399390034960512  
0.3974225720872212 0.5422055088915918 0.1499031123884522  
0.5107809526085142 0.4881013949083680 0.1612951008765443  
0.0076751242871650 0.9877885879735957 0.1431263110807632  
0.4370397087973751 0.7330623762445628 0.4292613443099291  
0.5353473847266166 0.6419805375368977 0.4283680325179062  
0.5456742823270074 0.5437126980133425 0.4113475451488484  
0.4529667442517165 0.5430572775730360 0.3937454285356564  
0.3550591006237021 0.6351715779677728 0.3957895081999883  
0.3456129411904525 0.7307928702148422 0.4135636116396320  
0.1741994018208461 0.6543534919335864 0.1438775091478947  
0.2305894634294548 0.3772302077554269 0.1442256971328396  
0.5623872927713016 0.5418895275178752 0.1320631487026912  
0.5628707123484772 0.3764042279397397 0.1456427858041704  
0.6434184989519087 0.4596021613351636 0.4055721610711416  
0.6415754674420848 0.6204918261777499 0.2767878023919443  
0.4574809338383603 0.7225959341023022 0.2305368142704307  
0.7566721416651414 0.4367861240282922 0.2266178505999996  
0.7220294282695260 0.4553922962874682 0.3341668300367465  
0.5520094205055646 0.5143842080625202 0.2519131769746376  
0.4670534849327453 0.6625054362747762 0.3336136963032783  
0.4314614705629468 0.8073748292841013 0.4405825968010666  
0.6057602544205302 0.6448585462569334 0.4389939431804908  
0.4608544539193443 0.4694067501219179 0.3792192349717449  
0.2858194024815200 0.6324165193935368 0.3820499713794006  
0.2699177130308756 0.8022719255844364 0.4130987500985471  
0.6076643617382892 0.4227888094912314 0.3141928463974443  
0.6457560311707937 0.3793609860389633 0.3706089980194637

Structure-IV

1.0000000000000000

14.7791996002000001 0.0000000000000000 0.0000000000000000

7.3866954629999997 12.8008386819000002 0.0000000000000000

0.0000000000000000 0.0000000000000000 23.0000000000000000

C N Fe H O

74 5 6 6 1

Direct

0.1732044720699123 0.9892116114722733 0.1454461788993105

0.0621124423581866 0.0450334793924594 0.1455255541306208

0.3393657965249576 0.9900552649806705 0.1443122329381343

0.2285839007384198 0.0453265296327265 0.1455224963645711

0.1729390439746255 0.1567303934841227 0.1461084654091536

0.0621153023304112 0.2116958298930689 0.146103108253811

0.3397151680651717 0.1562293312323606 0.1454164344553733

0.2287237465677381 0.212640655364796 0.1461662857970247

0.5063104436712109 0.9899932407869474 0.1430285497853605

0.3947956255379043 0.0458589131609601 0.1442125969391068

0.6727695278857858 0.989795145380507 0.1431242967533853

0.5615269825101933 0.0459624636844844 0.1435791669846662

0.5055046528766893 0.1580089206979466 0.1447436334313369

0.3943308576313101 0.2129371785206232 0.1457169075093048

0.6731009329718025 0.155868268663518 0.1442600210130487

0.5614440040780939 0.2132100213247936 0.1449623107661768

0.840135841134523 0.9891040179028191 0.1437060667138151

0.7285446592106463 0.0454044585822044 0.1437196719558448

0.8949854688409554 0.0451251749552393 0.1441745983148328

0.8393473583424806 0.1564496441902237 0.1439181960764376

0.0063917813880933 0.1560702832392416 0.1457265897619387

0.8951858140018825 0.2114904836950433 0.1446323379388796



0.0634123244515606 0.3780252867556829 0.1452181689616787  
0.3397376464464757 0.3234690141855927 0.1471569107109318  
0.1742550934881038 0.4896252977929605 0.1453380077246459  
0.0630999404504474 0.5438983049946777 0.1441882125494895  
0.340365857856504 0.4911689822295747 0.1481883939830879  
0.2290996224664665 0.5447244671770838 0.145709785844315  
0.5060871525717998 0.3239507958571367 0.146505343364833  
0.6708655545446263 0.3228744640956976 0.1428917529873565  
0.6710554263194596 0.4908025846887634 0.1353351719330637  
0.8389771772146509 0.3229145269358475 0.143123632601946  
0.725436292417172 0.3792577449144027 0.1400154357356749  
0.0075138800464288 0.3224017422616897 0.1453981440848617  
0.0067127649233402 0.4898816812642549 0.1440354671159092  
0.0633106812146153 0.7109827594114145 0.1438280985215566  
0.3388914876212521 0.654569678635674 0.1445238098175069  
0.1731720581745425 0.821770569599092 0.1439233009663769  
0.0623268975288343 0.8782823722510218 0.1440470633397964  
0.3398658837256739 0.8225293138563593 0.1432349715068926  
0.2287938796415369 0.8776652360025354 0.1446287342562539  
0.5069188863027159 0.6539308231003482 0.1369539333455059  
0.506305851718087 0.8226190728521827 0.1400164193667222  
0.3949902949141533 0.878820687092741 0.1425940608082659  
0.6730872404690041 0.8233750585455735 0.1407614995715643  
0.5619500695744781 0.8787281410571571 0.1411232014193212  
0.7288831914951838 0.7117605552713996 0.1396218512174329  
0.7286280414231929 0.878683844401488 0.1421016902545044  
0.0075977531480456 0.8217947096154339 0.1435683095342257  
0.895943358122935 0.8776648494566452 0.1432730730667057  
0.7273625559889476 0.2125815076784469 0.1436966995203892  
0.1736074195707265 0.323334706318719 0.1461932572535296  
0.3950933516522471 0.3786185792495335 0.1484484324843383  
0.22912534069691 0.7102590167803761 0.1439193695476817

0.395553556909239 0.7099241107730425 0.1420914860614781  
0.673367566167263 0.6568585918401667 0.1373113966616276  
0.5618284699389882 0.7108444670137648 0.1371302110789535  
0.8954693859475312 0.3783416984565281 0.1435839820785786  
0.7276327826803535 0.5451263730765157 0.1368507474680848  
0.8955958844218218 0.5452784655810975 0.1419122168662398  
0.8396286585757744 0.489808805694434 0.1404348757528929  
0.8406222116042569 0.6562537617123153 0.1409626331398186  
0.008406378994827 0.6553849676527889 0.143385455128069  
0.8404092480901425 0.8225447164819557 0.1423706695172015  
0.8963789996215303 0.7115852077181181 0.1421793332982934  
0.3961870482466932 0.5438126800183024 0.1498319694631883  
0.5100569457493924 0.4898839662784719 0.1613873339920364  
0.0066530363439333 0.9891664664098553 0.1446174048997117  
0.4429122483733827 0.7283517713724127 0.4259863652990823  
0.5393515573491294 0.6346578300058174 0.4286683156215812  
0.5489705748431409 0.5384742330380866 0.4081388649204448  
0.4589833889049274 0.5426350025946922 0.3815612110353197  
0.3622015518735042 0.6370301416002522 0.3811895399826287  
0.3526434355183982 0.7297673077821625 0.4034284886647692  
0.1731078694935319 0.6557735933342608 0.1447705959437932  
0.2294678945178767 0.3786202188371122 0.1465471508902707  
0.5612516059502837 0.5435174380631225 0.1312335656950609  
0.5615191373264996 0.3782622934948205 0.1458160215812755  
0.6474377012395893 0.4531243494295893 0.4093605754185195  
0.6447580571448537 0.622453431466748 0.2648669008840905  
0.4516229405357907 0.7301517786347644 0.2298856304968074  
0.7622583318151532 0.4290844409312148 0.2266691351439845  
0.7045593603024018 0.4673409958558402 0.3310942245589444  
0.5468045603655249 0.5238276019974091 0.2504282879330976  
0.4895588008220462 0.6688383112815305 0.3344043264186203  
0.4375625461897958 0.8001307284311028 0.4424620339736107

0.6083087099042691 0.6333702591347863 0.4466140758177451  
0.4650524495556879 0.4709236779033866 0.3648113139286185  
0.2945902407194617 0.6375481309168577 0.3618128383845063  
0.2781828852815981 0.8025902982175002 0.4014330859698492  
0.7045872002449366 0.305057946482739 0.400099743567942  
0.6440503405453473 0.3639256509198587 0.3820400158747684

Structure- $\bar{V}$

1.0000000000000000  
14.7791996002000001 0.0000000000000000 0.0000000000000000  
7.3866954629999997 12.8008386819000002 0.0000000000000000  
0.0000000000000000 0.0000000000000000 23.0000000000000000

C N Fe H

74 5 6 6

Direct

0.1769262635447096 0.9887664862070601 0.1416458039800603  
0.0657361446127552 0.0446336743910377 0.1412720350745640  
0.3431614394178829 0.9891829163380659 0.1401558361584377  
0.2322793355658826 0.0448536100535200 0.1414194674300561  
0.1765733942744521 0.1563173355002185 0.1414061884147717  
0.0657198562650939 0.2113634730342644 0.1408949790399643  
0.3433608803309871 0.1556599216017131 0.1400000021683885  
0.2323200244208349 0.2122487812022269 0.1410164442355226  
0.5099400966104518 0.9892963356745217 0.1376116785619072  
0.3985251441240782 0.0451465139188997 0.1392760232832935  
0.6762947625460694 0.9893259182916868 0.1368502822625401  
0.5650654934323718 0.0453313241216126 0.1372419011169347  
0.5090519037564356 0.1572614506709465 0.1378027513830553  
0.3979401973612438 0.2122799561640670 0.1393017793489902  
0.6766151222533692 0.1552961924851372 0.1369249910538677  
0.5650268417013121 0.2123955355605397 0.1371614787665518

0.8437459975668931 0.9886875314645660 0.1383294978182155  
0.7321240700606694 0.0448482816413293 0.1372714489076240  
0.8985616871468193 0.0448297885274057 0.1392275322015082  
0.8429151998856966 0.1561388120103998 0.1384467082952356  
0.0100313855753369 0.1557526961257337 0.1406329732556038  
0.8986054812710476 0.2115605233132879 0.1392910325469082  
0.0667807951106416 0.3777837064683395 0.1398754751537430  
0.3433290923131530 0.3229186653873560 0.1405100933947480  
0.1775677902707037 0.4891299735855208 0.1405686395090870  
0.0665533604791853 0.5434323200141710 0.1395637659655022  
0.3434727741780438 0.4906701422561621 0.1420073001115786  
0.2324121509257387 0.5443530391154475 0.1411230895659810  
0.5096308099457715 0.3230893205336813 0.1384759908376816  
0.6745381265938132 0.3221923873412444 0.1366855928751857  
0.6747894299920809 0.4904889154411424 0.1342106326343610  
0.8429495331392625 0.3225729367782686 0.1381121058681347  
0.7293676291856134 0.3789773629101987 0.1377139846083419  
0.0107702559689753 0.3222153453177439 0.1396443014319146  
0.0101852339857842 0.4893930169319596 0.1386820050006989  
0.0667498943965735 0.7106861876575524 0.1402876488435476  
0.3423870176649627 0.6544674361627100 0.1421932021306014  
0.1767298394187165 0.8213289837159948 0.1415964019175334  
0.0659100426046451 0.8778885382620526 0.1409508798340676  
0.3436209391380399 0.8220539584557673 0.1411305532176159  
0.2327666379029758 0.8770376733941346 0.1418157496329989  
0.5111817561907250 0.6533080398399682 0.1381502582537585  
0.5099339718475288 0.8218906946822675 0.1368907799178678  
0.3986301469060636 0.8780144886518906 0.1394232239012807  
0.6766506969845073 0.8227471072137855 0.1351331860635690  
0.5654860000305167 0.8780190367245650 0.1362572119402304  
0.7324856431401142 0.7112679929049019 0.1337591669070139  
0.7320864400044788 0.8782020856053226 0.1362317073610109

0.0111499996555992 0.8214299592093300 0.1400261796940687  
0.8995051256616671 0.8772857312895394 0.1386100304804364  
0.7310107686629905 0.2119858825454319 0.1370063226704932  
0.1772263566048641 0.3229446643038678 0.1407915841841956  
0.3985988911766340 0.3780675458715791 0.1409641138256659  
0.2324945651433743 0.7098809241637326 0.1415911162243097  
0.3992320691677474 0.7097138359405893 0.1422782087819355  
0.6769924836269009 0.6562111357384194 0.1323063345206478  
0.5658393997295607 0.7105645285281517 0.1347014084104957  
0.8989417346052221 0.3778317388293115 0.1378143440163193  
0.7314522568145422 0.5449367483252837 0.1332315539967380  
0.8990236510745571 0.5446957274681072 0.1363725450991495  
0.8431151366656451 0.4891132709285566 0.1355507928864436  
0.8440266575866694 0.6557708877115436 0.1354307217784146  
0.0118672937965689 0.6549821126279770 0.1390997221393709  
0.8438855354360231 0.8221799143436913 0.1372332871012166  
0.8998964290223911 0.7111516539482893 0.1372224523220058  
0.3994645631954986 0.5432346980987318 0.1442778041832813  
0.5130897713320383 0.4882752658794897 0.1549897481325304  
0.0101914836844617 0.9888096455019237 0.1406302033915450  
0.5270331684685033 0.6756261439116543 0.4191223843057256  
0.5531188525386422 0.5682134234316054 0.4116815548471706  
0.4678041625608997 0.5477541836247140 0.4208153639023956  
0.3650733159406676 0.6288748613139968 0.4294233883882162  
0.3407233195362592 0.7344014472990574 0.4304195316824311  
0.4227771753870863 0.7567891115261836 0.4254119601285082  
0.1765414998306012 0.6553748469974964 0.1413841598154869  
0.2329078627287807 0.3781675851342873 0.1408768030637927  
0.5653580652549938 0.5432485682014468 0.1283191353472369  
0.5654053865343226 0.3770837198389129 0.1376528453917312  
0.6454136273329376 0.4982126444173621 0.3867297527304443  
0.6270435412127728 0.5771594980704231 0.3124375454619158

0.4832425577498270 0.6785776245931631 0.2354549746003414  
0.7219697346965475 0.4361585822085196 0.2335698580217753  
0.6453826723952527 0.3970559871635110 0.3340219427240493  
0.5278442485660101 0.4907648881432918 0.2487213425094101  
0.4267932010582209 0.6644348614580425 0.3398479018506578  
0.5904578595357454 0.6930299464623056 0.4155733915618424  
0.4846007179531064 0.4670535332799099 0.4175272120256977  
0.3023585643752580 0.6104882920522706 0.4334695005772062  
0.2602908802082552 0.7971138013201010 0.4356094404865510  
0.4056291756246902 0.8377239781575083 0.4266729851785105  
0.5536696998246389 0.3814594544902365 0.2923246933775760

Structure-TS5

1.0000000000000000

14.7791996002000001 0.0000000000000000 0.0000000000000000  
7.3866954629999997 12.8008386819000002 0.0000000000000000  
0.0000000000000000 0.0000000000000000 23.0000000000000000

C N Fe H

74 5 6 6

Direct

0.1726166678043957 0.9886606124547438 0.1412249338787846  
0.0614686335539259 0.0444864007890341 0.1405535567092071  
0.3388155923642126 0.9894196654990367 0.1400918077320066  
0.2279853390825921 0.0447962780337449 0.1410305936787535  
0.1722618741014850 0.1562900511642274 0.1410415147209988  
0.0614582557354058 0.2112764205429269 0.1405144441366221  
0.3391105601210885 0.1556857797580142 0.1405000022106312  
0.2280780230924880 0.2121896477353267 0.1410893752506321  
0.5057520266529212 0.9893838034893842 0.1383235922763149  
0.3942838802932879 0.0452220567357012 0.1395275127526244  
0.6720792176842920 0.9893311813302974 0.1379686125795438  
0.5608891241506470 0.0453889473820684 0.1385347208153850

0.5048667386221950 0.1574127897602606 0.1397046007152561  
0.3937039251265368 0.2123587136950524 0.1407907324302312  
0.6724597233559144 0.1553411402427387 0.1387512808854587  
0.5608553933539543 0.2125923733745053 0.1398599878151045  
0.8395143128956298 0.9886130082138278 0.1383716587725897  
0.7279335064601185 0.0448479407681344 0.1382965030243899  
0.8943648593200838 0.0446661622536664 0.1387451304060785  
0.8387227901410913 0.1559594262517576 0.1381870805535377  
0.0057417271203145 0.1556156496474392 0.1401687005218875  
0.8945339196723696 0.2110580053559748 0.1389075867126763  
0.0626661534817016 0.3776229461406408 0.1398094324266546  
0.3390306833701792 0.3229173112897947 0.1424747997890584  
0.1735587039767891 0.4889865705828211 0.1410598985946890  
0.0623914205972820 0.5433369422623927 0.1395159017028581  
0.3395959458527565 0.4905072928390390 0.1449388437439032  
0.2283850874559380 0.5441200331241114 0.1422303360165109  
0.5054346737041432 0.3233346334575000 0.1421245384389813  
0.6702112472542664 0.3222915228663935 0.1380335158105555  
0.6705370668041313 0.4903023287223365 0.1336820292918617  
0.8383662183812484 0.3225552435736720 0.1377253781282786  
0.7249329455806546 0.3788073363279774 0.1355297078612800  
0.0067762052559211 0.3220355135895511 0.1396365403935454  
0.0060572167670580 0.4893286629049838 0.1386621326556223  
0.0626353246885910 0.7104876523414791 0.1400066384235562  
0.3381470691370489 0.6539839891227830 0.1431041701414734  
0.1725363372167834 0.8212103320009470 0.1410063489242947  
0.0617558730872823 0.8777140612944744 0.1401014458684951  
0.3394214760737675 0.8219838376542155 0.1411889866115376  
0.2282836283795067 0.8770443279701899 0.1416147921102367  
0.5065492473947497 0.6533796026976424 0.1363170541538752  
0.5057650873229060 0.8219928357188285 0.1369353958391384  
0.3944829079574445 0.8781527376925925 0.1393925457977830

0.6723947423337459 0.8227880672535339 0.1362411488376328  
0.5613462177739927 0.8780832414772000 0.1369854991200962  
0.7281052146761898 0.7112176495579291 0.1351358446208294  
0.7278572949418036 0.8781839244865273 0.1371701413557884  
0.0069826745174589 0.8212457932904109 0.1394518557054219  
0.8953010944263082 0.8771741434381308 0.1384546048535630  
0.7267299232957452 0.2120153426885719 0.1381254066467214  
0.1730031264985917 0.3228763288174631 0.1410141606033194  
0.3943847887354731 0.3780566070764664 0.1442935223536147  
0.2285174953277786 0.7095427618519712 0.1416416425279818  
0.3951000866793395 0.7093102173935770 0.1416479187737212  
0.6727412139461934 0.6562483382473728 0.1337062257275150  
0.5613433752420718 0.7102998070250013 0.1348349549564050  
0.8948577207048394 0.3779377182315224 0.1379418387197334  
0.7271308428090951 0.5447518540857545 0.1337241396163043  
0.8948566689972968 0.5447415027998715 0.1366189251617630  
0.8390354103125903 0.4892072035104593 0.1353985757398462  
0.8398134172933106 0.6557344382031154 0.1362372335585156  
0.0076772884968219 0.6548408446714010 0.1389923163723315  
0.8396503313911751 0.8221268122474897 0.1376197807625686  
0.8956191944869971 0.7110802327254427 0.1375670876087867  
0.3955582951424725 0.5430691188665516 0.1475726603490398  
0.5092926902476136 0.4886345707088169 0.1588942089354903  
0.0060012914970783 0.9886785629759148 0.1398080736631371  
0.5469260610633949 0.6274686818462917 0.4264147595752618  
0.5410286313617351 0.5379924528000797 0.4061016758712402  
0.4390334932322564 0.5591035178234340 0.3866752901819629  
0.3506313662515004 0.6595107690003024 0.3900972393845241  
0.3588595955578886 0.7452241192965132 0.4102223202386580  
0.4581185932015194 0.7280471717211695 0.4277379768378878  
0.1724073717140747 0.6551463089486543 0.1415809735956082  
0.2287928177643228 0.3780594463397611 0.1417333973835662



0.5607966649977716 0.5432378971265391 0.1309807690558917  
0.5608921660302808 0.3776724827109628 0.1416534263821803  
0.6289096201706406 0.4446941242792048 0.4000908711170509  
0.6467894123362821 0.5937357641855966 0.2713312867309745  
0.4516743524698777 0.7193126484817750 0.2303407009552533  
0.7565370712392835 0.4131448859054251 0.2259719617684891  
0.6929389530811553 0.4219902558003407 0.3296515817193371  
0.5399179476223240 0.5079186177122580 0.2527708013660095  
0.4801306647790985 0.6673414560616002 0.3341381912299206  
0.6234851660887480 0.6150432307742222 0.4388936159438957  
0.4325830651509045 0.4930693701211543 0.3706817555029762  
0.2753109839270061 0.6713423690004720 0.3753291813441484  
0.2912129118718700 0.8237131025516823 0.4100073286651872  
0.4669622584481012 0.7940689243847354 0.4411554763562149  
0.5948466892471069 0.4014021623262233 0.3389480717302515

Structure-VI

1.0000000000000000

14.7791996002000001 0.0000000000000000 0.0000000000000000

7.3866954629999997 12.8008386819000002 0.0000000000000000

0.0000000000000000 0.0000000000000000 23.0000000000000000

C N Fe H

74 5 6 7

Direct

0.1724943669665140 0.9888571717849010 0.1380346810703350

0.0614413905411643 0.0445681244922877 0.1372720405246630

0.3385752824687258 0.9896491229310902 0.1380076766479987

0.2278422856808961 0.0450248369102238 0.1380404607393034

0.1721749443534468 0.1565094050143276 0.1376560638644357

0.0614555532420657 0.2114503775194331 0.1369532893691305

0.3389645634278453 0.1558543399698941 0.1380643817040742

0.2279560053978582 0.2124043308903414 0.1379385010559170  
0.5056410067849422 0.9894703209432570 0.1373535426824363  
0.3940838233072357 0.0454317367111518 0.1377967116054409  
0.6719776211545756 0.9894523603244484 0.1368953808385456  
0.5608194258339309 0.0455017429684737 0.1373869192869123  
0.5048327814886319 0.1575944322476978 0.1382204501494420  
0.3936010536521075 0.2125918008720181 0.1385903421451962  
0.6724749722842316 0.1553975908702731 0.1377262253459480  
0.5607654535591451 0.2127502628396772 0.1385397740949915  
0.8394209469270060 0.9886809403826620 0.1368227618074497  
0.7278866103658671 0.0449381443533616 0.1369645085461451  
0.8941718518165840 0.0448631453588787 0.1369598625451924  
0.8386348800105774 0.1560069084005962 0.1371371946778266  
0.0058610238858863 0.1556555238619544 0.1369125765873460  
0.8946588999332366 0.2112523481603181 0.1370141566028846  
0.0627299009887502 0.3778214484934153 0.1364998907486802  
0.3389283700900392 0.3230908308403295 0.1398939688241011  
0.1734191945395187 0.4892245132107141 0.1383269410712054  
0.0622836019553308 0.5435344238742307 0.1369376022480440  
0.3392559345731402 0.4907841969098057 0.1423713831676997  
0.2281390280546463 0.5443383213699489 0.1397400214907167  
0.5052206295774463 0.3235470042450307 0.1403020785902195  
0.6703218065848844 0.3222979097966571 0.1401274161694820  
0.6706500407519803 0.4907000827611909 0.1359630067842744  
0.8393535256651157 0.3224503104549776 0.1368403016108335  
0.7255433287523928 0.3790593799808311 0.1384471123535377  
0.0067795055821137 0.3222381272141944 0.1361933002536986  
0.0060977735044423 0.4894791273635742 0.1360165998552689  
0.0624567170192703 0.7107827714806729 0.1379173285712165  
0.3379507894454878 0.6547726241982191 0.1411221607441017  
0.1723276057760931 0.8215148061547851 0.1383369457524828  
0.0614833539775674 0.8779868249490810 0.1376708953320672

0.3391490610800243 0.8221852152076593 0.1387545277217296  
0.2281374440252538 0.8773243585638530 0.1387275622914243  
0.5060041601038411 0.6534642589995462 0.1355761099876251  
0.5053824506507089 0.8222695534151959 0.1367248980374952  
0.3942077699538640 0.8784267090642047 0.1378340563834383  
0.6722658222960904 0.8229471923547279 0.1359426371841366  
0.5611992095637182 0.8781858810855158 0.1366943838005539  
0.7281593762099279 0.7113053010585182 0.1347944223567983  
0.7277043236210130 0.8782745363246468 0.1363577020547247  
0.0067793845097069 0.8214334286393646 0.1374363145764051  
0.8950914516679340 0.8773317548992222 0.1367263249416305  
0.7267727032656299 0.2119109000882999 0.1383043661568222  
0.1729272294831162 0.3231126013182804 0.1377671700808884  
0.3941737259055875 0.3783358881658203 0.1418871494473581  
0.2281412836865516 0.7100636381321090 0.1394451202974306  
0.3944336826328023 0.7100130189060473 0.1389299970282265  
0.6730492827224455 0.6561924629990785 0.1340444621636925  
0.5610091808398296 0.7103031217262443 0.1357009456319992  
0.8951023019120495 0.3779587445064785 0.1356460767377530  
0.7275419399493988 0.5448472842606157 0.1340871923596712  
0.8948580078455117 0.5447831430773312 0.1348948568392165  
0.8392111761322935 0.4891341340097767 0.1343097681964972  
0.8398335227169751 0.6558136729938541 0.1351061037024136  
0.0076016568188079 0.6550638646816812 0.1369266851522508  
0.8395359734105261 0.8222408349599595 0.1362620620126410  
0.8956056282771331 0.7112429678512191 0.1360505531077484  
0.3950915794717851 0.5434419322575119 0.1450999459983739  
0.5083155640898370 0.4886475613955161 0.1562791257810875  
0.0058460304482449 0.9888529893361450 0.1372536904783739  
0.5474594405079101 0.6129098202295097 0.4271023245007529  
0.5236128919763070 0.5353986038394388 0.4061319788401660  
0.4188396930038042 0.5732442718794065 0.3858303702544865

0.3440137730129980 0.6803657693082945 0.3865576400009653  
0.3700727929189849 0.7550264949948138 0.4052906322709085  
0.4729024460448089 0.7203465450764949 0.4255578296813995  
0.1722553364794476 0.6555558017141968 0.1393304488234902  
0.2286199015066541 0.3783416253151070 0.1388265559697482  
0.5607633891237186 0.5431340080713359 0.1301367300891079  
0.5603471625866492 0.3781427801584000 0.1397386684219606  
0.6039959963153333 0.4337047561420123 0.4007686088757032  
0.6573199223205973 0.5807550398653449 0.2563615349147730  
0.4727848247710570 0.7130561810377724 0.2290650631845641  
0.7281885644284577 0.3916002907394440 0.2296863261623381  
0.6713989933216240 0.4512932608561325 0.3313121353697907  
0.5269036032546247 0.5129840098131182 0.2501329075432243  
0.5054255992033743 0.6586498150202325 0.3340705030065108  
0.6265750034595128 0.5856878682270283 0.4429688350066125  
0.3983357719145718 0.5166804485860326 0.3689251566164959  
0.2653515357535475 0.7059064103079226 0.3705822002163020  
0.3123677865960884 0.8379517152443006 0.4043139345709102  
0.4947635483624815 0.7767719720506342 0.4406596838388883  
0.5753582616898151 0.3840239069835212 0.3937798387574599  
0.7662014519815407 0.4578866477871555 0.2836504730846589

Structure-TS6

1.0000000000000000

14.7791996002000001 0.0000000000000000 0.0000000000000000

7.3866954629999997 12.8008386819000002 0.0000000000000000

0.0000000000000000 0.0000000000000000 23.0000000000000000

C N Fe H

74 5 6 7

Direct

0.1704291447283474 0.9901858877172262 0.1388787216361898

0.0593339599148431 0.0459600033849402 0.1385634182690401

0.3365416017061363 0.9909524136240849 0.1384223999591368  
0.2258022198392354 0.0463365639454242 0.1389470433388871  
0.1701324379955323 0.1578246353608554 0.1389731668038005  
0.0593518840883627 0.2127912413596492 0.1384816600517664  
0.3369488904769423 0.1571311992159449 0.1387559232912985  
0.2259420932856260 0.2136860582504626 0.1389709664469255  
0.5036078722433130 0.9907779448311498 0.1375613309999031  
0.3920707772119328 0.0467212656864171 0.1383044014577524  
0.6699211254302865 0.9907184661910821 0.1368960595578484  
0.5587312565558912 0.0467868252172364 0.1374159268721683  
0.5027085753718351 0.1588527834042364 0.1377437486645391  
0.3914980451761493 0.2138824902134855 0.1385767882573952  
0.6703587161597516 0.1566675992567166 0.1365232439633270  
0.5586334625175907 0.2140071973280642 0.1370573174591281  
0.8373400361227158 0.9900492388707486 0.1371455270412437  
0.7257881800646476 0.0462375488263491 0.1367766497192361  
0.8921304634756343 0.0462161079793106 0.1374921867454848  
0.8365836848951279 0.1573658298542266 0.1372061327661523  
0.0036988922070770 0.1570941171353051 0.1383329522173670  
0.8924946091678857 0.2127102695909832 0.1376983413110291  
0.0605730006857980 0.3791467344956966 0.1377855142731040  
0.3368137052667697 0.3243786388171179 0.1392868232097269  
0.1712728190149105 0.4905487196836761 0.1383149194547538  
0.0601327231079434 0.5448869124140208 0.1375905446658039  
0.3370628028534300 0.4921101159384359 0.1398253501129033  
0.2259865534543677 0.5457335708161066 0.1386043837326689  
0.5030879842821120 0.3247926467056699 0.1377280629339152  
0.6680978589821455 0.3236124683226506 0.1372147073490422  
0.6687424566059118 0.4919083030751166 0.1345408853805367  
0.8371305210689335 0.3239070377702791 0.1371161108328619  
0.7234068870852888 0.3804153802331485 0.1372145370522467  
0.0046250177422521 0.3235757603472283 0.1376635033686131

0.0039667277098426 0.4907984207005097 0.1370795938501320  
0.0603334173070703 0.7121226301399063 0.1379416747169780  
0.3358216179028911 0.6562102351070678 0.1383852111409152  
0.1701865575207096 0.8229031465261762 0.1381143868115032  
0.0594099823857612 0.8793415711968692 0.1380598058786295  
0.3371585926019770 0.8234192069309277 0.1375240918095789  
0.2260752816095077 0.8786247950257933 0.1385440078226147  
0.5039852415818510 0.6549287432461679 0.1330770408950344  
0.5034123396612459 0.8235742108899659 0.1360283411721183  
0.3921771110960120 0.8796913699702529 0.1373736861152047  
0.6702341396843746 0.8241909016089167 0.1358736083642326  
0.5591872618377232 0.8794913184722215 0.1365852654251150  
0.7260838721802622 0.7125755005495664 0.1347410639331739  
0.7256499350777139 0.8795720675548129 0.1365158670130745  
0.0047170539499450 0.8227817076074829 0.1377706996652919  
0.8930221678698623 0.8786797543560773 0.1372567987985130  
0.7246543289384512 0.2132350655633055 0.1368221245973191  
0.1708490037793617 0.3244149917148146 0.1386514477455986  
0.3920562370885923 0.3796960652011541 0.1398333061016963  
0.2260654287824478 0.7113883901199559 0.1381789269960926  
0.3924541441938456 0.7113078672880596 0.1364066903241625  
0.6710054109250898 0.6574192625736154 0.1334894599792542  
0.5590970924049562 0.7116360823102158 0.1342523529691319  
0.8929058962201945 0.3793105768154071 0.1366509913077085  
0.7254736762340896 0.5461175551782301 0.1340091769438932  
0.8927361007080941 0.5460863015797071 0.1357911692296627  
0.8370759560389746 0.4904278891517228 0.1350587857283635  
0.8377262647846844 0.6571072715950381 0.1356213246548682  
0.0054508724865982 0.6563968470363832 0.1373727061170535  
0.8374686144984296 0.8235593544844576 0.1367225405952933  
0.8934762776322109 0.7125403950582618 0.1365972439394089  
0.3929894781840276 0.5448158975691345 0.1415673713099441

0.5060013481188729 0.4898161037682218 0.1520830062881720  
0.0037847655971675 0.9902386166722911 0.1380956868127439  
0.5591426686203040 0.6172745056457010 0.4259101036632679  
0.5384255750142635 0.5337313871225423 0.4149767927327903  
0.4367790908243398 0.5622923037165705 0.3923995338360551  
0.3585280647367804 0.6678334527705269 0.3864092050733708  
0.3798926517915734 0.7486242273103377 0.3990631621681458  
0.4808754662907164 0.7226764933292626 0.4184510243156099  
0.1701211789678199 0.6568563483203775 0.1385422008010555  
0.2265052810604030 0.3796488352772286 0.1389300623746158  
0.5592733551949445 0.5445318173684541 0.1274820647663049  
0.5582707297211954 0.3792792396130155 0.1357767180295578  
0.6188232541857031 0.4328686014207009 0.4221767872466223  
0.6566943817432285 0.5703462410199210 0.2615364762202289  
0.4727395034152043 0.7132264138976208 0.2274602842130375  
0.7213410281675002 0.3825520454779877 0.2306560926968240  
0.6588209972741808 0.4403589103484809 0.3319680086921619  
0.5185155425841147 0.5160216766204258 0.2440881214318505  
0.5067857912783564 0.6448667165011828 0.3313495460087550  
0.6369767442539850 0.5968061720761180 0.4409519710259285  
0.4201366055575900 0.5002943688252299 0.3811465258643351  
0.2819279301205958 0.6868856385854434 0.3697441606850355  
0.3203668243674344 0.8300229600153551 0.3923870282115973  
0.4993908089091521 0.7841131289084511 0.4272050018887913  
0.5962903817994142 0.3779936123695986 0.4160771440483739  
0.7235708263067692 0.4104979925926918 0.3917165225438915

Structure-VII

1.00000000000000

14.7791996002000001 0.0000000000000000 0.0000000000000000

7.3866954629999997 12.8008386819000002 0.0000000000000000

0.0000000000000000 0.0000000000000000 23.0000000000000000

C N Fe H

74 5 6 7

Direct

0.1687542001968133 0.9912831554660494 0.1408072672345826  
0.0576602920302612 0.0470387351074003 0.1394759416430477  
0.3349354195630128 0.9919515636575680 0.1403383340630144  
0.2241665281915991 0.0473749577797282 0.1406258572405584  
0.1684643585394575 0.1588708504348895 0.1397742055038792  
0.0577345066284167 0.2138047965407369 0.1384833108915885  
0.3352750970261975 0.1581811279859328 0.1394789290170184  
0.2242668991799602 0.2147401295651954 0.1395889381236210  
0.5019751211755917 0.9918120920077008 0.1383386264289837  
0.3904113817227735 0.0477906891667759 0.1394783737123365  
0.6683425102763302 0.9917696168340964 0.1368407542281813  
0.5570926323682784 0.0478381025808120 0.1375634145906280  
0.5010523962068054 0.1599464480902064 0.1376707319910836  
0.3898484897726119 0.2149107049528728 0.1388605323825857  
0.6688332679598384 0.1577477535286947 0.1357600601338342  
0.5569903393147818 0.2150719674108368 0.1365304629150821  
0.8357677100150050 0.9910105246269818 0.1369946164093904  
0.7242429682232128 0.0472751449827951 0.1363629747249995  
0.8906300972287754 0.0471263249352529 0.1372395746072823  
0.8350147993163852 0.1582541138964610 0.1361985109886982  
0.0020233607153585 0.1581656893443986 0.1382816065740795  
0.8908410792322510 0.2137417042075259 0.1366922998980589  
0.0589515622182222 0.3801249081057585 0.1376893281013537  
0.3352276490616355 0.3253890496287045 0.1395853660123625  
0.1696588817044545 0.4915778613423820 0.1390181986485262  
0.0585183285643243 0.5459007100288322 0.1380956884277680  
0.3355431321489394 0.4931162167859002 0.1405330400260028



0.2243573870076442 0.5467432854147475 0.1395146978413953  
0.5015524949482577 0.3258163832737120 0.1373727375057263  
0.6666907744139009 0.3247639576947151 0.1361186845825487  
0.6666915883311576 0.4932373337641929 0.1329561451352262  
0.8353690961162720 0.3249821350799527 0.1354256164165773  
0.7215917932690756 0.3816219146232154 0.1349568632476207  
0.0029335834004295 0.3245932443797869 0.1371108649236904  
0.0023020408301044 0.4918393864929778 0.1370389072374347  
0.0587536189844691 0.7130902528816233 0.1389382405532667  
0.3341728094162867 0.6569808938236436 0.1406672574071839  
0.1685909422624401 0.8238766563359133 0.1403841634843838  
0.0578843723204016 0.8802852901204785 0.1394450048515966  
0.3355479283166424 0.8245911527305207 0.1406267682649131  
0.2244870833717327 0.8796536723483129 0.1412433478954506  
0.5024584428297035 0.6561554200929635 0.1346402280104110  
0.5018279691093847 0.8244623997033051 0.1374060342481925  
0.3905866444451485 0.8806447930572763 0.1397697280440611  
0.6686084749281580 0.8252722293154928 0.1362802217097302  
0.5575129930014566 0.8805014870899885 0.1373879626496541  
0.7243829606146182 0.7137418882644275 0.1348828300911536  
0.7241342659248545 0.8806288748629777 0.1367293633947379  
0.0031527070625703 0.8237542189851517 0.1387191215840175  
0.8915491664396655 0.8796285234267256 0.1376582035414627  
0.7231834999692213 0.2141766917038519 0.1356960888171590  
0.1691386077956827 0.3254065860652376 0.1390073816013038  
0.3905560045717245 0.3805825207722510 0.1400146330234327  
0.2245426166309446 0.7122862886461901 0.1401803597982484  
0.3911051476048417 0.7121604195054442 0.1400015768337418  
0.6689633490626959 0.6587930404104136 0.1334173608045155  
0.5573203125320023 0.7129787246935364 0.1346255329272877  
0.8912494056548522 0.3803578230860543 0.1354926018300783  
0.7235106098894087 0.5473086764317630 0.1332944837532273

0.8910637910552938 0.5471310083157617 0.1354415719149191  
0.8352896133096301 0.4915856465481062 0.1342160874502362  
0.8360400152531811 0.6581904494374790 0.1356021864663120  
0.0038469625744238 0.6574064684888655 0.1380508379997402  
0.8359446476891088 0.8245427535988018 0.1370544507455194  
0.8918614532249053 0.7135479781942068 0.1369796028016787  
0.3913370087833197 0.5457113364369930 0.1428517345136434  
0.5048433813753979 0.4905409348809224 0.1533376398522950  
0.0022205948075017 0.9912121779980412 0.1388350585478648  
0.5703279355282955 0.6133051129181482 0.4231844633449263  
0.5462955583521955 0.5327625481454336 0.4128974498695889  
0.4454271337656658 0.5570805576969023 0.3925255138023929  
0.3687836905562373 0.6624246273040042 0.3819529128826529  
0.3929961736171396 0.7432979102713022 0.3905420788854058  
0.4932423654942983 0.7184674911599180 0.4110970902998073  
0.1684824689303829 0.6578334656459555 0.1397446771876277  
0.2249032898994154 0.3806018416509311 0.1394666263977533  
0.5570007508078914 0.5462125243671068 0.1276748142476709  
0.5565545372132775 0.3804342951810025 0.1353069422338986  
0.6266986576287319 0.4251604663551516 0.4196212849142317  
0.6567630189124241 0.5667921728500869 0.2585650477633523  
0.4567581631638171 0.7091554508135670 0.2323453307894768  
0.7273619524233013 0.3755511585416421 0.2291644688669998  
0.6638617030616586 0.4347888067579858 0.3297073426175156  
0.5247467279830809 0.5092329083435749 0.2453675401420971  
0.5130948865941920 0.6290249814175716 0.3318865942302242  
0.6482593478080341 0.5933255213724676 0.4378506067490521  
0.4286839527660486 0.4940430216209475 0.3848181173656323  
0.2929630256618111 0.6803306616091580 0.3647324327614492  
0.3349860439373619 0.8238928971885879 0.3807519385339703  
0.5132366991851504 0.7796580957482188 0.4162720947555573  
0.5970553083767720 0.3777540702956229 0.4298545595767755

0.6814870926230482 0.4158386697742179 0.4498009489617928
